# Supplementary material for: Use of selective serotonin reuptake inhibitors and lifestyle among women of childbearing age: a Danish cross-sectional survey
Source: PubMed Central journal article supplement — BMJ Open. 2013 Jul 30;3(7):e003024. doi: 10.1136/bmjopen-2013-003024 (PMC3731776; doi:10.1136/bmjopen-2013-003024), 2013-07-30
Supplement: bmjopen-2013-003024.draft_revisions.pdf [file bmjopen-2013-003024.draft_revisions.pdf]

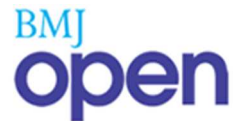

**Use of selective serotonin reuptake inhibitors and lifestyle among women of childbearing age: a Danish cross-sectional study**

|                                 |                                                                                                                                                                                                                                                                                                                                                                                                                                                                                                                                                                                                                                                                                 |
|---------------------------------|---------------------------------------------------------------------------------------------------------------------------------------------------------------------------------------------------------------------------------------------------------------------------------------------------------------------------------------------------------------------------------------------------------------------------------------------------------------------------------------------------------------------------------------------------------------------------------------------------------------------------------------------------------------------------------|
| Journal:                        | <i>BMJ Open</i>                                                                                                                                                                                                                                                                                                                                                                                                                                                                                                                                                                                                                                                                 |
| Manuscript ID:                  | bmjopen-2013-003024                                                                                                                                                                                                                                                                                                                                                                                                                                                                                                                                                                                                                                                             |
| Article Type:                   | Research                                                                                                                                                                                                                                                                                                                                                                                                                                                                                                                                                                                                                                                                        |
| Date Submitted by the Author:   | 09-Apr-2013                                                                                                                                                                                                                                                                                                                                                                                                                                                                                                                                                                                                                                                                     |
| Complete List of Authors:       | Laugesen, Kristina; Institute of Clinical Medicine, Aarhus University Hospital, Department of Clinical Epidemiology<br>Telén Andersen, Ane Birgitte; Aarhus University Hospital, Department of Clinical Epidemiology<br>Nørgaard, Mette; Aarhus University Hospital, Department of Clinical Epidemiology<br>Bech Nielsen, Rikke; Aarhus University Hospital, Department of Clinical Epidemiology<br>Wernich Thomsen, Reimar; Aarhus University Hospital, Department of Clinical Epidemiology<br>Breinholt Larsen, Finn; Public Health and Quality Improvement, Central Denmark Region<br>Toft Sørensen, Henrik; Aarhus University Hospital, Department of Clinical Epidemiology |
| <b>Primary Subject Heading</b>: | Public health                                                                                                                                                                                                                                                                                                                                                                                                                                                                                                                                                                                                                                                                   |
| Secondary Subject Heading:      | Mental health, Smoking and tobacco, Nutrition and metabolism                                                                                                                                                                                                                                                                                                                                                                                                                                                                                                                                                                                                                    |
| Keywords:                       | Adult psychiatry < PSYCHIATRY, MENTAL HEALTH, Maternal medicine < OBSTETRICS, PUBLIC HEALTH                                                                                                                                                                                                                                                                                                                                                                                                                                                                                                                                                                                     |
|                                 |                                                                                                                                                                                                                                                                                                                                                                                                                                                                                                                                                                                                                                                                                 |

SCHOLARONE™  
Manuscripts

1  
2  
3  
4 **Use of selective serotonin reuptake inhibitors and lifestyle among women of childbearing age:**  
5  
6

7 **A Danish cross-sectional study**  
8

9  
10 Kristina Laugesen<sup>1</sup>, Ane Birgitte Telén Andersen<sup>1</sup>, Mette Nørgaard<sup>1</sup>, Rikke Bech Nielsen<sup>1</sup>, Reimar  
11  
12 Wernich Thomsen<sup>1</sup>, Finn Breinholt Larsen<sup>2</sup>, Henrik Toft Sørensen<sup>1</sup>  
13  
14

15  
16  
17  
18 <sup>1</sup> Department of Clinical Epidemiology, Institute of Clinical Medicine, Aarhus University Hospital,  
19  
20 8200 Aarhus, Denmark  
21

22  
23 <sup>2</sup> Public Health and Quality Improvement, Central Denmark Region, 8200 Aarhus, Denmark  
24  
25  
26  
27

28 **Corresponding author:** Kristina Laugesen, Department of Clinical Epidemiology, Institute of  
29  
30 Clinical Medicine, Aarhus University Hospital, Olof Palmes Allé 43-45, 8200 Aarhus N, Denmark.  
31  
32 Phone: +4587168063; Fax: +4587167215; E-mail: kristina.laugesen@studmed.au.dk  
33  
34  
35  
36  
37  
38  
39  
40

41 **Keywords:** antidepressants, lifestyle, women, fertile  
42  
43  
44  
45  
46  
47  
48  
49  
50  
51  
52  
53  
54  
55  
56  
57  
58  
59  
60

**ABSTRACT**

**Objective** To examine the use of selective serotonin reuptake inhibitors (SSRIs) among Danish women of childbearing age according to lifestyle factors.

**Design** Cross-sectional study.

**Setting** The Central Denmark Region.

**Participants** 4,234 women (71.5% of the invited) aged 25-44 years who participated in a public health survey in 2006.

**Outcome measures** Prevalence and prevalence ratios (PRs) of current and former SSRI use among women characterized by selected lifestyle factors. We obtained information on SSRI use through linkage to the Aarhus University Prescription Database covering all pharmacies in the region.

**Results** Of 4,234 women in the study, 161 (3.8%) were current SSRI users, 60 (1.4%) were recent users, 223 (5.3%) were former users, and 3,790 (89.5%) were never users. Current use of SSRIs was more prevalent in obese women than in non-obese women (PR = 1.5, 95% CI: 1.0 to 2.3), in current smokers compared with non-current smokers (PR = 1.6, 95% CI: 1.1 to 2.2), in women who consumed more than 14 alcoholic drinks weekly compared with women who drank 14 or fewer drinks weekly (PR = 1.8, 95% CI: 1.2 to 2.8), and in women with an unhealthy diet compared with women with a healthy diet (PR = 1.7, 95% CI: 1.2 to 2.6). Prevalence of former use of SSRIs was similarly increased except in those with an unhealthy diet (PR= 1.1, 95% CI: 0.8 to 1.7). SSRI use did not differ according to regular physical exercise.

**Conclusion** Women with an unhealthy lifestyle were about 1.5-fold more likely to be current or former users of SSRIs than those with a healthy lifestyle. These findings may be useful for

1  
2  
3  
4 quantitative assessment of the contribution of lifestyle factors to uncontrolled confounding in  
5  
6 studies of SSRI use in pregnancy.  
7  
8  
9

## 10 11 **ARTICLE SUMMARY** 12 13

### 14 15 **Article focus** 16

- 17 • To examine whether current and former use of SSRIs differ according to lifestyle factors  
18 among women of childbearing age.  
19  
20  
21  
22  
23

### 24 25 **Key messages** 26

- 27 • Of 4,234 women aged 25-44 years participating in a public health survey, 161 (3.8%) were  
28 current SSRI users, 60 (1.4%) were recent users, and 223 (5.3%) were former users.  
29  
30
- 31 • Current and former use of SSRIs were at least 1.5-fold or more prevalent in women who  
32 were obese, who were current smokers, or who had higher than recommended weekly  
33 alcohol intake, as compared with women with a healthier lifestyle. Current but not former  
34 use of SSRIs was more common in women with an unhealthy diet. SSRI use did not differ  
35 much according to amount of regular physical exercise.  
36  
37  
38  
39  
40  
41  
42  
43  
44  
45

### 46 47 **Strengths and limitations of this study** 48

- 49 • SSRI use was identified from a comprehensive population-based prescription database, thus  
50 eliminating recall bias. The high quality and completeness of data in this database has been  
51 documented. Detailed information on lifestyle factors was available from questionnaires.  
52  
53  
54  
55  
56  
57  
58  
59  
60

- Because the study was based on volunteers in a health survey (participation rate of women of childbearing age = 71.5%), participants may have been more health conscious than non-participants.
- Filled prescriptions may not be an entirely perfect measure of actual drug intake and its timing and thus may have led to some misclassification of SSRI use.

For peer review only

## INTRODUCTION

More than 10% of pregnant women experience depression.[1] In deciding to initiate antidepressant drug treatment in pregnant women, potential negative effects of untreated depression on the mother and fetus [2-7] must be weighed against the risk of adverse pregnancy outcomes associated with in utero exposure to antidepressant drugs.[2]

Selective serotonin reuptake inhibitors (SSRIs) constitute the most commonly used class of antidepressants. Use of these drugs has substantially increased [8,9] in recent years. In Denmark, 2.4% of all pregnant women were treated with SSRIs in 2006, compared with 0.3% in 1997.[10] In a number of studies, SSRI use has been associated with adverse pregnancy outcomes including preterm birth, poor neonatal adaptation, low birth weight, persistent pulmonary hypertension, and cardiac malformations.[11-16] Other studies have not found such associations.[17,18] Studies investigating these associations often have lacked information on maternal lifestyle factors, such as smoking,[12] alcohol consumption,[14-17] and body mass index (BMI),[11,12,15,16]. Thus, they may have been biased by uncontrolled confounding, complicating interpretation of their results.

Unhealthy lifestyle choices during pregnancy, including smoking, alcohol consumption, and obesity, are known to be associated with increased risk of adverse pregnancy outcomes.[19-22] Still, few studies have investigated whether use of antidepressants differs according to lifestyle factors. Available studies have reported that depression and antidepressant use are more frequent among smokers, alcohol consumers, and obese people.[23-25] In the current study, we used data from a Danish public health survey to examine the relation between SSRI use and lifestyle among women of childbearing age.

## METHODS

### Study design

We conducted a cross-sectional study based on a 2006 public health survey administered in the Central Denmark region.

### Setting

Denmark has 5.5 million inhabitants and is administratively divided into five regions. We conducted this study in one of these regions, the Central Denmark Region, with a population of about 1.2 million people. The Danish healthcare system provides tax-supported healthcare to all residents, guaranteeing free and unfettered access to primary and secondary care. Except for emergencies, general practitioners (GPs) are patients' initial contact with the health care system. GPs either treat the patients themselves or refer them to hospitals or specialists in the primary health care sector.

The unique 10-digit central personal registry number (CPR number) assigned to each Danish citizen at birth and to residents upon immigration [26] allows accurate and unambiguous linkage of all medical and administrative registries at the individual level in Denmark.

### Study population

The study population was identified through the survey, "Hvordan har du det?"/"How Are You?", a questionnaire-based public health study conducted by the Centre for Public Health (now Centre for Public Health and Quality Improvement), Central Denmark Region. In 2006, a sample of 31,500 people, living in the region, was invited to participate in the study. Eligible participants, identified through the Civil Registration System, were 25-79 years of age, residents of the Central Denmark Region, and Danish citizens with at least one parent born in Denmark. In total, 21,708 (69%)

1  
2  
3  
4 invited persons agreed to participate. A questionnaire and stamped return envelope was delivered by  
5  
6 mail. In order to maximize participation [27], three reminders were sent to non-respondents. Those  
7  
8 who agreed to participate completed a detailed questionnaire containing approximately 400  
9  
10 questions on self-rated health, occurrence of chronic diseases, socioeconomic factors, and lifestyle  
11  
12 factors. The current study was based on a subsample of female respondents of childbearing age,  
13  
14 defined as age 25-44 years. In this subsample, 4,234 (71.5 %) invited women agreed to participate.  
15  
16 The survey has been described in detail elsewhere (available in Danish:  
17  
18 <http://www.cfk.rm.dk/udgivelser/befolkningsundersogelser>).  
19  
20  
21  
22  
23

#### 24 **Data on lifestyle factors**

25  
26 Lifestyle factors included in the study were BMI, exercise, diet, smoking status, and alcohol intake.  
27  
28 BMI was calculated as self-reported weight in kilograms divided by self-reported height in meters  
29  
30 squared. BMI was categorized according to WHO criteria as underweight (BMI<18.5), normal  
31  
32 weight (BMI 18.5-24.99), overweight (BMI 25-29.99), and obese (BMI ≥30).[28] Physical activity  
33  
34 was operationalized as participation in leisure sports or other regular physical activity (yes/no). Diet  
35  
36 was categorized based on a detailed food questionnaire with 30 different questions. Responses were  
37  
38 first summarized into four diet components (fruit, vegetables, fish, and fat) and then summarized  
39  
40 into categories of healthy, reasonably healthy, or unhealthy diet. Smoking status was categorized as  
41  
42 never, former, and current (daily or occasional) tobacco smoking. Finally, alcohol use was  
43  
44 categorized according to the Danish Health and Medicine Authority's recommendations at the time  
45  
46 of the survey, *i.e.*, higher than recommended (>14 drinks weekly) or within recommended  
47  
48 guidelines (≤14 drinks weekly).[29]  
49  
50  
51  
52  
53  
54  
55  
56  
57  
58  
59  
60



### Data on SSRI antidepressant drugs

In Denmark, antidepressants are available on prescription only. All pharmacies in the Central Denmark Region are equipped with a computerized accounting system that transmits data to the Danish Health Service for reimbursement of prescribed drugs. According to an agreement with Aarhus University, the National Health Service subdivision of the Central Denmark Region transfers individually identifiable prescription redemption data from the pharmacies to the Aarhus University Prescription Database (AUPD). The AUPD contains information on the CPR number of the patient, type of drug prescribed according to name and the Anatomic Therapeutic Chemical classification system (ATC), and date the prescription was redeemed.[30] Data are available from 1996 onwards. We classified current users of SSRIs (ATC code N06AB) as those who redeemed at least one prescription within 90 days before and up to 30 days after completing the survey questionnaire. We defined recent users as those who redeemed a SSRI prescription in the period from 365 until 91 days before completing the questionnaire. Former users were those who redeemed at least one SSRI prescription more than 365 days before completing the questionnaire but had no prescriptions within 365 days before and up to 30 days after questionnaire completion. Never users were defined as women who never had a prescription for a SSRI.

### STATISTICAL ANALYSES

We computed the prevalence of SSRI use (current, former, and never use) according to the available lifestyle factors. We then calculated prevalence ratios (PRs) with 95% confidence intervals (CIs) for current SSRI use and former SSRI use, comparing obese (BMI  $\geq$  30) to non-obese women (BMI < 30), current smokers to non-current smokers (never and former smokers), women with higher than weekly recommended alcohol use to women who used alcohol within the

recommended amount, women with an unhealthy diet to women with a healthy diet (healthy and reasonably healthy), and women who exercised regularly to women who did not.

In a sensitivity analysis, we added recent SSRI users to the group of current users and estimated PRs for current/recent use with 95% CIs associated with lifestyle factors. This analysis was undertaken to investigate whether potential misclassification between current and recent users could have affected our estimates.

All statistical analyses were conducted using Stata software (Release 12, StataCorp LP). The study was approved by the Danish Data Protection Agency (Record no. 2009-41-3866).

## RESULTS

In total, 4,234 women (71.5% of those invited) aged 25 - 44 years participated in the survey. Of these, 161 (3.8%) were current SSRI users, 223 (1.4%) were former users, 60 (5.3%) were recent users, and 3,790 (89.5%) were never users. Table 1 shows the distribution of SSRI use (current, former, and never use) according to lifestyle factors.

Table 2 shows PRs for current, current/recent, and former use of SSRIs according to the lifestyle factors. Obese women had a higher prevalence of current SSRI use than non-obese women (PR = 1.5, 95% CI: 1.0 to 2.3). Current smokers had a higher prevalence of current SSRI use than non-current smokers (PR = 1.6, 95% CI: 1.1 to 2.2). Women with higher than recommended weekly alcohol intake had a higher prevalence of current SSRI use than women whose weekly alcohol intake was within the recommendations (PR = 1.8, 95% CI: 1.2 to 2.8). Women with an unhealthy diet had a higher prevalence of current SSRI use than women with a healthy diet (PR= 1.7, 95% CI: 1.2 to 2.6). Women who engaged in or did not engage in regular physical exercise had a similar prevalence of current SSRI use. The prevalence of former SSRI use by lifestyle factors followed the same pattern as current use. The only exception was unhealthy diet (PR = 1.1, 95% CI: 0.8-1.7).

1  
2  
3  
4 In the sensitivity analysis, which added recent users to the group of current users, the PRs for SSRI  
5 use were very similar to those in the main analysis (Table 2).  
6  
7  
8  
9

## 10 **DISCUSSION**

11  
12 In our study, women with unhealthy lifestyles were more often current or former users of SSRIs  
13 compared with women with healthier lifestyles. However, the prevalence of current and former  
14 SSRI use among women not engaging in regular exercise was similar to that among women who  
15 exercised regularly. Current but not former use of SSRIs was more common in women with an  
16 unhealthy diet. Our study contributes to knowledge of how use of SSRIs differs according to  
17 lifestyle choices among women of childbearing age.  
18  
19  
20  
21  
22  
23  
24

25  
26 Our study differs from earlier studies [23-25] by focusing on women of childbearing age. Therefore,  
27 our findings are applicable for assessing potential confounding in studies of birth outcomes in  
28 women using SSRIs.  
29  
30  
31

32  
33 However, our findings are in line with the previous findings in populations consisting of both men  
34 and women, thus underlining the reliability of our results. A French questionnaire-based public  
35 health survey including 10,252 men and women over age 18 years found that both non-smokers and  
36 former smokers had 30% lower risk of being prescribed an antidepressant drug than current  
37 smokers.[25] An American study including 43,093 men and women found that abusers of alcohol  
38 had an increased risk of major depression compared with lifetime abstainers [OR = 2.1 (95% CI:  
39 1.3 to 3.4) for young adults not attending college and OR = 1.3 (95% CI: 1.0 to 1.6) for adults over  
40 age 30, respectively].[23] Also, a meta-analysis including in total 58,745 men and women found  
41 that obese persons were at increased risk of developing depression over time [pooled OR = 1.55  
42 (95% CI: 1.23 to 2.01)].[24]  
43  
44  
45  
46  
47  
48  
49  
50  
51  
52  
53  
54  
55  
56  
57  
58  
59  
60

1  
2  
3  
4  
5  
6 We identified use of SSRIs from a comprehensive population-based prescription database thus  
7  
8 eliminating recall bias. This database is complete regarding SSRIs.[30] Furthermore, our use of  
9  
10 questionnaires permitted collection of detailed information on the selected lifestyle factors.  
11  
12

13  
14  
15 Our study also has limitations. The study was cross-sectional and based on responses of women  
16  
17 who volunteered to participate in a health survey. Because participants in such surveys might be  
18  
19 more health conscious than non-participants, our cohort may not be representative of lifestyle  
20  
21 choices in the general population. Survey participation was 69% overall and 71.5% among women  
22  
23 aged 25 - 44 years. It is possible that non-participants may have differed from participants not only  
24  
25 in lifestyle but also in the prevalence of major depression. This may have led us to underestimate  
26  
27 the prevalence of SSRI use among women with unhealthy lifestyles. Furthermore, as information on  
28  
29 the prevalence of SSRI use among women with unhealthy lifestyles. Furthermore, as information on  
30  
31 lifestyle factors was self-reported, it is possible that unhealthy lifestyles were underreported. Also,  
32  
33 redeemed prescriptions may be an imperfect measure of actual drug intake and timing. This may  
34  
35 have led to misclassification of some non-users as SSRI users due to non-compliance. While this  
36  
37 would not explain our finding of a higher prevalence of current SSRI use among women with an  
38  
39 unhealthy lifestyle, it could have led us to underestimate the association.  
40  
41  
42  
43

44 In conclusion, women with an unhealthy lifestyle were about 1.5-fold more likely to be current or  
45  
46 former SSRI users than women with a healthier lifestyle. These results may be useful in quantifying  
47  
48 the degree to which uncontrolled confounding by lifestyle factors may affect studies of SSRI use  
49  
50 during pregnancy.  
51  
52  
53  
54  
55  
56  
57  
58  
59  
60

**Table 1.** Distribution of selective serotonin reuptake inhibitor (SSRI) use in women aged 25-44 years according to lifestyle factors.

|                                  | Current use of<br>SSRIs<br>N (%) | Recent use of<br>SSRIs<br>N (%) | Former use of<br>SSRIs<br>N (%) | Never use of<br>SSRIs<br>N (%) | Total<br>N (%) |
|----------------------------------|----------------------------------|---------------------------------|---------------------------------|--------------------------------|----------------|
| <b>BMI</b>                       |                                  |                                 |                                 |                                |                |
| <18.5                            | 5 (5.1)                          | 3 (3.1)                         | 3 (3.1)                         | 87 (88.8)                      | 98 (100)       |
| 18.5-24.9                        | 72 (3.0)                         | 36 (1.5)                        | 128 (5.2)                       | 2,245 (90.5)                   | 2,481 (100)    |
| 25.0-29.9                        | 49 (4.9)                         | 11 (1.1)                        | 47 (4.7)                        | 890 (89.3)                     | 997 (100)      |
| ≥30.0                            | 30 (5.3)                         | 8 (1.4)                         | 38 (6.8)                        | 486 (86.5)                     | 562 (100)      |
| Missing                          | 5 (5.2)                          | 2 (2.1)                         | 7 (7.3)                         | 82 (85.4)                      | 96 (100)       |
| <b>Smoking</b>                   |                                  |                                 |                                 |                                |                |
| Current                          | 44 (5.1)                         | 20 (2.3)                        | 67 (7.8)                        | 725 (84.7)                     | 856 (100)      |
| Former                           | 33 (3.2)                         | 12 (1.2)                        | 59 (5.5)                        | 912 (89.8)                     | 1,016 (100)    |
| Never                            | 82 (3.5)                         | 27 (1.2)                        | 95 (4.1)                        | 2,136 (91.3)                   | 2,340 (100)    |
| Missing                          | 2 (9.1)                          | 1 (4.5)                         | 2 (9.1)                         | 17 (77.3)                      | 22 (100)       |
| <b>Diet</b>                      |                                  |                                 |                                 |                                |                |
| Unhealthy                        | 26 (6.1)                         | 12 (2.8)                        | 24 (5.6)                        | 366 (85.5)                     | 428 (100)      |
| Reasonable healthy               | 95 (3.5)                         | 33 (1.2)                        | 144 (5.3)                       | 2,465 (90.1)                   | 2,737 (100)    |
| Healthy                          | 38 (3.8)                         | 14 (1.4)                        | 48 (4.8)                        | 895 (90.0)                     | 995 (100)      |
| Missing                          | 2 (1.5)                          | 59 (44.7)                       | 7 (5.3)                         | 64 (48.5)                      | 132 (100)      |
| <b>Intake of alcohol</b>         |                                  |                                 |                                 |                                |                |
| More than 14 drinks weekly       | 23 (6.3)                         | 2 (0.5)                         | 23 (6.3)                        | 320 (87.0)                     | 368 (100)      |
| 14 drinks or less weekly         | 124 (3.5)                        | 49 (1.4)                        | 165 (4.7)                       | 3,197 (90.4)                   | 3,535 (100)    |
| Missing                          | 14 (4.2)                         | 9 (2.7)                         | 35 (10.6)                       | 273 (82.5)                     | 331 (100)      |
| <b>Regular physical exercise</b> |                                  |                                 |                                 |                                |                |
| Yes                              | 77 (3.6)                         | 24 (1.1)                        | 102 (4.8)                       | 1,935 (90.5)                   | 2,138 (100)    |
| No                               | 83 (4.1)                         | 35 (1.7)                        | 119 (5.8)                       | 1,803 (88.4)                   | 2,040 (100)    |
| Missing                          | 1 (1.8)                          | 1 (1.8)                         | 2 (3.6)                         | 52 (92.9)                      | 56 (100)       |

Diet: Responses were first summarized into four diet components (fruit, vegetables, fish, and fat) and then summarized into categories of healthy, reasonably healthy, or unhealthy diet.

1  
2  
3  
4  
5  
6  
7  
8  
9  
10  
11  
12  
13  
14  
15  
16  
17  
18  
19  
20  
21  
22  
23  
24  
25  
26  
27  
28  
29  
30  
31  
32  
33  
34  
35  
36  
37  
38  
39  
40  
41  
42  
43  
44  
45  
46  
47  
48  
49  
50  
51  
52  
53  
54  
55  
56  
57  
58  
59  
60

Regular physical exercise: Physical activity was operationalized as participation in leisure sports or other regular physical activity (yes/no)

For peer review only

**Table 2.** Prevalence ratios (PRs) and 95% confidence intervals (95% CIs) for use of selective serotonin reuptake inhibitors (SSRIs) in women aged 25-44 years, according to different lifestyle factors.

| SSRI use           | PRs comparing obese vs. non-obese women<br>[95% CIs] | PRs comparing current smokers vs. non-current smokers<br>[95% CIs] | PRs comparing alcohol intake above 14 drinks weekly vs. alcohol intake of 14 drinks or less weekly<br>[95% CIs] | PRs comparing unhealthy diet vs. healthy diet<br>[95% CIs] | PRs comparing regular exercise vs. no regular exercise<br>[95% CIs] |
|--------------------|------------------------------------------------------|--------------------------------------------------------------------|-----------------------------------------------------------------------------------------------------------------|------------------------------------------------------------|---------------------------------------------------------------------|
| Never use          | 1 (reference)                                        | 1 (reference)                                                      | 1 (reference)                                                                                                   | 1 (reference)                                              | 1 (reference)                                                       |
| Current use        | 1.5 [1.0 – 2.3]                                      | 1.6 [1.1 – 2.2]                                                    | 1.8 [1.2 – 2.8]                                                                                                 | 1.7 [1.2 – 2.6]                                            | 0.9 [0.6 – 1.2]                                                     |
| Current/recent use | 1.4 [1.0 – 2.0]                                      | 1.7 [1.3 – 2.2]                                                    | 1.4 [0.9 – 2.1]                                                                                                 | 1.8 [1.3 – 2.6]                                            | 0.8 [0.6 – 1.0]                                                     |
| Former use         | 1.4 [1.0 – 1.9]                                      | 1.8 [1.3 – 2.3]                                                    | 1.4 [0.9 – 2.1]                                                                                                 | 1.1 [0.8 – 1.7]                                            | 0.8 [0.6 – 1.0]                                                     |

Current/recent use: In this group, we added recent use to current use. Current use was defined as women who redeemed at least one prescription within 90 days before and up to 30 days after completing the survey questionnaire. And recent use was defined as women who redeemed a prescription in the period from 365 until 91 days before completing the questionnaire.

1  
2  
3  
4  
5  
6  
7  
8  
9  
10  
11 **Acknowledgements:** We wish to thank all the participants who helped us conduct this study by  
12 completing questionnaires.  
13

14  
15  
16  
17  
18  
19  
20 **Funding:** This research was supported by the Clinical Epidemiology Research Foundation, Aarhus  
21 University Hospital, Denmark. The Department of Clinical Epidemiology, Aarhus University  
22 Hospital, receives funding for other studies from companies in the form of research grants to (and  
23 administered by) Aarhus University. None of these studies have any relation to the present study.  
24  
25  
26  
27  
28

29  
30  
31 **Competing interests:** None declared.  
32

33  
34 **Data sharing statement:** No additional data available.  
35

36  
37 **Contributorship statement:** KL, ABTA and MN made primary contributions to writing the  
38 manuscript. All authors contributed to the study conception and study design. RN made the data  
39 collection and KL the statistical analyses. All authors contributed to interpretation of results, all  
40 revised the manuscript critically, and all approved the final manuscript.  
41  
42  
43  
44  
45  
46  
47  
48  
49  
50  
51  
52  
53  
54  
55  
56  
57  
58  
59  
60



**REFERENCES**

1 Bennett HA, Einarson A, Taddio A, et al. Prevalence of depression during pregnancy; systematic review. *Obstet Gynecol* 2004;**103**:698-709.

2 Bennett HA, Einarson A, Taddio A, et al. Depression during Pregnancy: Overview of Clinical Factors. *Clin Drug Investig* 2004;**24**:157-179.

3 Pajulo M, Savonlahti E, Sourander A, et al. Antenatal depression, substance dependency and social support. *J Affect Disord* 2001;**65**:9-17.

4 Zuckerman B, Amaro H, Baucher H, et al. Depressive symptoms during pregnancy: relationship to poor health behaviors. *Am J Obstet gynecol* 1989;**160**:1107-1111.

5 Lejoyeux M, Leon E, Rouillon F. Prevalence and risk factors of suicide and attempted suicide. *Encephale* 1994;**20**:495-503.

6 Bonari L, Pinto N, Ahn E, et al. Perinatal risks of untreated depression during pregnancy. *Can J Psychiatry* 2004;**49**:726-735.

7 Grote NK, Bridge JA, Gavin AR, et al. A meta-analysis of depression during pregnancy and the risk of preterm birth, low birth weight, and intrauterine growth restriction. *Arch Gen Psychiatry* 2010;**67**:1012-1024.

8 Cooper WO, Willy ME, Pont SJ, et al. Increasing use of antidepressants in pregnancy. *Am J Obstet Gynecol* 2007;**196**:544.e1-e5.

9 Andrade SE, Raebel MA, Brown J, et al. Use of antidepressant medications during pregnancy: a multisite study. *Am J Obstet Gynecol* 2008;**198**:194.e1-e5.

1  
2  
3  
4 10 Available at: [http://www.sst.dk/Nyhedscenter/Nyheder/2007/nye\\_tal\\_20-07.aspx](http://www.sst.dk/Nyhedscenter/Nyheder/2007/nye_tal_20-07.aspx) . Accesed 3/29  
5  
6 2013.

7  
8  
9 11 Chambers CD, Johnson KA, Dick LM, et al. Birth outcomes in pregnant women taking  
10  
11  
12 fluoxetine. *N Engl J Med* 1996;**335**:1010-1015.

13  
14 12 Wen SW, Yang Q, Garner P, et al. Selective serotonin reuptake inhibitors and adverse  
15  
16  
17 pregnancy outcomes. *Am J Obstet Gynecol* 2006;**194**:961-966.

18  
19  
20 13 Lund N, Pedersen LH, Henriksen TB. Selective serotonin reuptake inhibitor exposure in utero  
21  
22  
23 and pregnancy outcomes. *Arch Pediatr Adolesc Med* 2009;**163**:949-954.

24  
25 14 Reis M, Kallen B. Delivery outcome after maternal use of antidepressant drugs in pregnancy: an  
26  
27  
28 update using Swedish data. *Psychol Med* 2010;**40**:1723-1733.

29  
30 15 Pedersen LH, Henriksen TB, Vestergaard M, et al. Selective serotonin reuptake inhibitors in  
31  
32  
33 pregnancy and congenital malformations: population based cohort study. *BMJ* 2009;**339**:b3569.

34  
35 16 Kieler H, Artama M, Engeland A, et al. Selective serotonin reuptake inhibitors during pregnancy  
36  
37  
38 and risk of persistent pulmonary hypertension in the newborn: population based cohort study from  
39  
40  
41 the five Nordic countries. *BMJ* 2012;**339**:d8012.

42  
43 17 Reis M, Kallen B. Combined use of selective serotonin reuptake inhibitors and  
44  
45  
46 sedatives/hypnotics during pregnancy: risk of relatively severe congenital malformations or cardiac  
47  
48  
49 defects: A register study. *BMJ Open* 2013;**3**.

50  
51 18 Alwan S, Reefhuis J, Rasmussen SA, et al. Use of selective serotonin-reuptake inhibitors in  
52  
53  
54 pregnancy and the risk of birth defects. *N Engl J Med* 2007;**356**:2684-2692.

1  
2  
3  
4 19 Rogers JM. Tobacco and pregnancy: overview of exposures and effects. *Birth Defects Res C*  
5 *embryo Today* 2008;**84**:1-15.

6  
7  
8  
9 20 Dennedy MC, Avalos G, O'Reilly MW, et al. The impact of maternal obesity on gestational  
10 *outcomes. Ir Med J* 2012;**105**:23-25.

11  
12  
13  
14 21 Erickson AC, Arbour LT. Heavy smoking during pregnancy as a marker for other risk factors of  
15 *adverse birth outcomes: a population-based study in British Columbia, Canada. BMC Public*  
16 *Health* 2012;**12**:102.

17  
18  
19  
20 22 Mateja WA, Nelson DB, Kroelinger CD, et al. The association between maternal alcohol use  
21 *and smoking in early pregnancy and congenital cardiac defects. J Womens Health (Larchmt)*  
22 *2012;21*:26-34.

23  
24  
25  
26 23 Dawson DA, Grant BF, Stinson FS, et al. Psychopathology associated with drinking and alcohol  
27 *use disorders in the college and general adult populations. Drug Alcohol Depend* 2005;**77**:139-  
28 150.

29  
30  
31  
32 24 Luppino FS, de Wit LM, Bouvy PF, et al. Overweight, obesity, and depression: a systematic  
33 *review and meta-analysis of longitudinal studies. Arch gen Psychiatry* 2010;**67**:220-229.

34  
35  
36  
37 25 Cheron-Launay M, Le Faou AL, Sevilla-Dedieu C, et al. Smoking and the consumption of  
38 *antidepressants, anxiolytics and hypnotic drugs: results of a large, French epidemiological study in*  
39 *2005. Addict Behav* 2011;**36**:743-748.

40  
41  
42  
43 26 Pedersen CB. The Danish Civil Registration System. *Scand J Public Health* 2011;**39**:22-25.

44  
45  
46  
47 27 Edwards P, Roberts I, Clarke M, et al. Increasing response rates to postal questionnaires:  
48 *systematic review. BMJ* 2002;**324**:1183.

1  
2  
3  
4 28 Available at: [http://apps.who.int/bmi/index.jsp?introPage=intro\\_3.html](http://apps.who.int/bmi/index.jsp?introPage=intro_3.html) . Accessed 3/29 2013.  
5  
6

7 29 Available at:

8  
9 [www.sst.dk/Sundhed%20og%20forebyggelse/Alkohol/UdmeldingerOmAlkohol.aspx](http://www.sst.dk/Sundhed%20og%20forebyggelse/Alkohol/UdmeldingerOmAlkohol.aspx). Accessed 3/29  
10  
11 2013.  
12

13  
14 30 Ehrenstein V, Antonsen S, Pedersen L. Existing data sources for clinical epidemiology: Aarhus  
15 University Prescription Database. *Clin Epidemiol* 2010;**2**:273-279.  
16  
17  
18  
19  
20  
21  
22  
23  
24  
25  
26  
27  
28  
29  
30  
31  
32  
33  
34  
35  
36  
37  
38  
39  
40  
41  
42  
43  
44  
45  
46  
47  
48  
49  
50  
51  
52  
53  
54  
55  
56  
57  
58  
59  
60

STROBE 2007 (v4) Statement—Checklist of items that should be included in reports of *cross-sectional studies*

| Section/Topic                | Item # | Recommendation                                                                                                                                                                       | Reported on page # |
|------------------------------|--------|--------------------------------------------------------------------------------------------------------------------------------------------------------------------------------------|--------------------|
| Title and abstract           | 1      | (a) Indicate the study's design with a commonly used term in the title or the abstract                                                                                               | 1,2                |
|                              |        | (b) Provide in the abstract an informative and balanced summary of what was done and what was found                                                                                  | 2                  |
| <b>Introduction</b>          |        |                                                                                                                                                                                      |                    |
| Background/rationale         | 2      | Explain the scientific background and rationale for the investigation being reported                                                                                                 | 5                  |
| Objectives                   | 3      | State specific objectives, including any prespecified hypotheses                                                                                                                     | 5                  |
| <b>Methods</b>               |        |                                                                                                                                                                                      |                    |
| Study design                 | 4      | Present key elements of study design early in the paper                                                                                                                              | 6                  |
| Setting                      | 5      | Describe the setting, locations, and relevant dates, including periods of recruitment, exposure, follow-up, and data collection                                                      | 6                  |
| Participants                 | 6      | (a) Give the eligibility criteria, and the sources and methods of selection of participants                                                                                          | 6,7                |
| Variables                    | 7      | Clearly define all outcomes, exposures, predictors, potential confounders, and effect modifiers. Give diagnostic criteria, if applicable                                             | 7,8                |
| Data sources/<br>measurement | 8*     | For each variable of interest, give sources of data and details of methods of assessment (measurement). Describe comparability of assessment methods if there is more than one group | 7,8                |
| Bias                         | 9      | Describe any efforts to address potential sources of bias                                                                                                                            |                    |
| Study size                   | 10     | Explain how the study size was arrived at                                                                                                                                            | 7                  |
| Quantitative variables       | 11     | Explain how quantitative variables were handled in the analyses. If applicable, describe which groupings were chosen and why                                                         | 7                  |
| Statistical methods          | 12     | (a) Describe all statistical methods, including those used to control for confounding                                                                                                | 8,9                |
|                              |        | (b) Describe any methods used to examine subgroups and interactions                                                                                                                  |                    |
|                              |        | (c) Explain how missing data were addressed                                                                                                                                          |                    |
|                              |        | (d) If applicable, describe analytical methods taking account of sampling strategy                                                                                                   |                    |
|                              |        | (e) Describe any sensitivity analyses                                                                                                                                                | 9                  |
| <b>Results</b>               |        |                                                                                                                                                                                      |                    |

|                          |     |                                                                                                                                                                                                              |       |
|--------------------------|-----|--------------------------------------------------------------------------------------------------------------------------------------------------------------------------------------------------------------|-------|
| Participants             | 13* | (a) Report numbers of individuals at each stage of study—eg numbers potentially eligible, examined for eligibility, confirmed eligible, included in the study, completing follow-up, and analysed            | 9     |
|                          |     | (b) Give reasons for non-participation at each stage                                                                                                                                                         | 9     |
|                          |     | (c) Consider use of a flow diagram                                                                                                                                                                           |       |
| Descriptive data         | 14* | (a) Give characteristics of study participants (eg demographic, clinical, social) and information on exposures and potential confounders                                                                     | 9,12  |
|                          |     | (b) Indicate number of participants with missing data for each variable of interest                                                                                                                          | 12    |
| Outcome data             | 15* | Report numbers of outcome events or summary measures                                                                                                                                                         | 9,12  |
| Main results             | 16  | (a) Give unadjusted estimates and, if applicable, confounder-adjusted estimates and their precision (eg, 95% confidence interval). Make clear which confounders were adjusted for and why they were included | 14    |
|                          |     | (b) Report category boundaries when continuous variables were categorized                                                                                                                                    | 7,12  |
|                          |     | (c) If relevant, consider translating estimates of relative risk into absolute risk for a meaningful time period                                                                                             |       |
| Other analyses           | 17  | Report other analyses done—eg analyses of subgroups and interactions, and sensitivity analyses                                                                                                               | 10,14 |
| <b>Discussion</b>        |     |                                                                                                                                                                                                              |       |
| Key results              | 18  | Summarise key results with reference to study objectives                                                                                                                                                     | 10    |
| Limitations              | 19  | Discuss limitations of the study, taking into account sources of potential bias or imprecision. Discuss both direction and magnitude of any potential bias                                                   | 11    |
| Interpretation           | 20  | Give a cautious overall interpretation of results considering objectives, limitations, multiplicity of analyses, results from similar studies, and other relevant evidence                                   | 10    |
| Generalisability         | 21  | Discuss the generalisability (external validity) of the study results                                                                                                                                        | 10    |
| <b>Other information</b> |     |                                                                                                                                                                                                              |       |
| Funding                  | 22  | Give the source of funding and the role of the funders for the present study and, if applicable, for the original study on which the present article is based                                                | 15    |

\*Give information separately for cases and controls in case-control studies and, if applicable, for exposed and unexposed groups in cohort and cross-sectional studies.

**Note:** An Explanation and Elaboration article discusses each checklist item and gives methodological background and published examples of transparent reporting. The STROBE checklist is best used in conjunction with this article (freely available on the Web sites of PLoS Medicine at <http://www.plosmedicine.org/>, Annals of Internal Medicine at <http://www.annals.org/>, and Epidemiology at <http://www.epidem.com/>). Information on the STROBE Initiative is available at [www.strobe-statement.org](http://www.strobe-statement.org).



**Use of selective serotonin reuptake inhibitors and lifestyle among women of childbearing age: a Danish cross-sectional survey**

|                                 |                                                                                                                                                                                                                                                                                                                                                                                                                                                                                                                                                                                                                                                                                 |
|---------------------------------|---------------------------------------------------------------------------------------------------------------------------------------------------------------------------------------------------------------------------------------------------------------------------------------------------------------------------------------------------------------------------------------------------------------------------------------------------------------------------------------------------------------------------------------------------------------------------------------------------------------------------------------------------------------------------------|
| Journal:                        | <i>BMJ Open</i>                                                                                                                                                                                                                                                                                                                                                                                                                                                                                                                                                                                                                                                                 |
| Manuscript ID:                  | bmjopen-2013-003024.R1                                                                                                                                                                                                                                                                                                                                                                                                                                                                                                                                                                                                                                                          |
| Article Type:                   | Research                                                                                                                                                                                                                                                                                                                                                                                                                                                                                                                                                                                                                                                                        |
| Date Submitted by the Author:   | 07-Jun-2013                                                                                                                                                                                                                                                                                                                                                                                                                                                                                                                                                                                                                                                                     |
| Complete List of Authors:       | Laugesen, Kristina; Institute of Clinical Medicine, Aarhus University Hospital, Department of Clinical Epidemiology<br>Telén Andersen, Ane Birgitte; Aarhus University Hospital, Department of Clinical Epidemiology<br>Nørgaard, Mette; Aarhus University Hospital, Department of Clinical Epidemiology<br>Bech Nielsen, Rikke; Aarhus University Hospital, Department of Clinical Epidemiology<br>Wernich Thomsen, Reimar; Aarhus University Hospital, Department of Clinical Epidemiology<br>Breinholt Larsen, Finn; Public Health and Quality Improvement, Central Denmark Region<br>Toft Sørensen, Henrik; Aarhus University Hospital, Department of Clinical Epidemiology |
| <b>Primary Subject Heading</b>: | Public health                                                                                                                                                                                                                                                                                                                                                                                                                                                                                                                                                                                                                                                                   |
| Secondary Subject Heading:      | Mental health, Smoking and tobacco, Nutrition and metabolism                                                                                                                                                                                                                                                                                                                                                                                                                                                                                                                                                                                                                    |
| Keywords:                       | Adult psychiatry < PSYCHIATRY, MENTAL HEALTH, Maternal medicine < OBSTETRICS, PUBLIC HEALTH                                                                                                                                                                                                                                                                                                                                                                                                                                                                                                                                                                                     |
|                                 |                                                                                                                                                                                                                                                                                                                                                                                                                                                                                                                                                                                                                                                                                 |

SCHOLARONE™  
Manuscripts

1  
2  
3  
4 **Use of selective serotonin reuptake inhibitors and lifestyle among women of childbearing age:**  
5  
6

7 **A Danish cross-sectional survey**  
8

9  
10 Kristina Laugesen<sup>1</sup>, Ane Birgitte Telén Andersen<sup>1</sup>, Mette Nørgaard<sup>1</sup>, Rikke Beck Nielsen<sup>1</sup>, Reimar  
11  
12 Wernich Thomsen<sup>1</sup>, Finn Breinholt Larsen<sup>2</sup>, Henrik Toft Sørensen<sup>1</sup>  
13  
14

15  
16  
17  
18 <sup>1</sup> Department of Clinical Epidemiology, Institute of Clinical Medicine, Aarhus University Hospital,  
19  
20 8200 Aarhus, Denmark  
21

22  
23 <sup>2</sup> Public Health and Quality Improvement, Central Denmark Region, 8200 Aarhus, Denmark  
24  
25  
26  
27

28 **Corresponding author:** Kristina Laugesen, Department of Clinical Epidemiology, Institute of  
29  
30 Clinical Medicine, Aarhus University Hospital, Olof Palmes Allé 43-45, 8200 Aarhus N, Denmark.  
31  
32 Phone: +4587168063; Fax: +4587167215; E-mail: kristina.laugesen@studmed.au.dk  
33  
34  
35  
36  
37  
38  
39  
40

41 **Keywords:** antidepressants, lifestyle, women, fertile  
42  
43  
44  
45  
46  
47  
48  
49  
50  
51  
52  
53  
54  
55  
56  
57  
58  
59  
60



## ABSTRACT

**Objective** To examine the use of selective serotonin reuptake inhibitors (SSRIs) among Danish women of childbearing age according to lifestyle factors.

**Design** Cross-sectional survey.

**Setting** The Central Denmark Region.

**Participants** 4,234 women (71.5% of the invited) aged 25-44 years who participated in a public health survey in 2006.

**Outcome measures** Prevalence and prevalence ratios (PRs) of current and former SSRI use among women characterized by selected lifestyle factors. We obtained information on SSRI use through linkage to the Aarhus University Prescription Database covering all pharmacies in the region.

**Results** Of 4,234 women in the study, 161 (3.8%) were current SSRI users, 60 (1.4%) were recent users, 223 (5.3%) were former users, and 3,790 (89.5%) were never users. Current use of SSRIs was more prevalent in obese women than in non-obese women (PR = 1.5, 95% CI: 1.0 to 2.3), in current smokers compared with non-current smokers (PR = 1.6, 95% CI: 1.1 to 2.2), in women who drank more than seven alcoholic drinks weekly compared with women who drank seven or fewer drinks weekly (PR = 1.8, 95% CI: 1.2 to 2.8), and in women with an unhealthy diet compared with women with a healthy diet (PR = 1.7, 95% CI: 1.2 to 2.6). Prevalence of former use of SSRIs was similarly increased except in those with an unhealthy diet (PR= 1.1, 95% CI: 0.8 to 1.7). SSRI use did not differ according to participation in regular physical activity.

**Conclusion** Women with an unhealthy lifestyle were about 1.5-fold more likely to be current or former users of SSRIs than those with a healthy lifestyle. These findings may be useful for

1  
2  
3  
4 quantitative assessment of the contribution of lifestyle factors to uncontrolled confounding in  
5  
6 studies of SSRI use in pregnancy.  
7  
8  
9

## 10 11 **ARTICLE SUMMARY** 12 13

### 14 15 **Article focus** 16

- 17 • To examine whether current and former use of SSRIs differ according to lifestyle factors  
18 among women of childbearing age.  
19  
20  
21  
22  
23  
24

### 25 26 **Key messages** 27

- 28 • Of 4,234 women aged 25-44 years participating in a public health survey, 161 (3.8%) were  
29 current SSRI users, 60 (1.4%) were recent users, and 223 (5.3%) were former users.  
30  
31
- 32 • Current and former use of SSRIs were at least 1.5-fold or more prevalent in women who  
33 were obese, who were current smokers, or who had a weekly alcohol intake above seven  
34 drinks, as compared with women with a healthier lifestyle. Current but not former use of  
35 SSRIs was more common in women with an unhealthy diet and in women with intake of  
36 alcohol of more than 14 drinks weekly. SSRI use did not differ much according to  
37 participation in regular physical activity.  
38  
39  
40  
41  
42  
43  
44  
45  
46  
47  
48

### 49 50 **Strengths and limitations of this study** 51

- 52 • SSRI use was identified from a comprehensive population-based prescription database, thus  
53 eliminating recall bias. The high quality and completeness of data in this database has been  
54 documented. Detailed information on lifestyle factors was available from questionnaires.  
55  
56  
57  
58  
59  
60

- Because the study was based on volunteers in a health survey (participation rate of women of childbearing age = 71.5%), participants may have been more health conscious than non-participants.
- Filled prescriptions may not be an entirely perfect measure of actual drug intake and its timing and thus may have led to some misclassification of SSRI use.

For peer review only

## INTRODUCTION

More than 10% of pregnant women experience depression.[1] In deciding to initiate antidepressant drug treatment in pregnant women, potential negative effects of untreated depression on the mother and fetus [2-6] must be weighed against the risk of adverse pregnancy outcomes associated with in utero exposure to antidepressant drugs.[2]

Selective serotonin reuptake inhibitors (SSRIs) constitute the most commonly used class of antidepressants. Use of these drugs has substantially increased [7,8] in recent years. In Denmark, 2.4% of all pregnant women were treated with SSRIs in 2006, compared with 0.3% in 1997.[9] In a number of studies, SSRI use has been associated with adverse pregnancy outcomes including preterm birth, poor neonatal adaptation, low birth weight, persistent pulmonary hypertension, and cardiac malformations.[10-15]. One study reported an elevated risk of risk of cardiac malformations after prenatal exposure to SSRI, but concluded that this was due to unaccounted confounding.[15] However, other studies did not find such associations.[16,17] Studies investigating these associations often have lacked information on maternal lifestyle factors, such as smoking,[10] alcohol consumption,[12-14] and body mass index (BMI),[10,13,14]. Thus, they may have been biased by uncontrolled confounding, complicating interpretation of their results.

Unhealthy lifestyle choices during pregnancy, including smoking, alcohol consumption, and obesity, are known to be associated with increased risk of adverse pregnancy outcomes.[18-21] Still, few studies have investigated whether use of antidepressants differs according to lifestyle factors. Available studies have reported that depression and antidepressant use are more frequent among smokers, alcohol consumers, and obese people.[22-24] In the current study, we used data from a Danish public health survey to examine the relation between SSRI use and lifestyle among women of childbearing age.

## METHODS

### Study design

We conducted a cross-sectional study based on a 2006 public health survey administered in the Central Denmark region.

### Setting

Denmark has 5.5 million inhabitants and is administratively divided into five regions. We conducted this study in one of these regions, the Central Denmark Region, with a population of about 1.2 million people. The Danish healthcare system provides tax-supported healthcare to all residents, guaranteeing free and unfettered access to primary and secondary care. Except for emergencies, general practitioners (GPs) are patients' initial contact with the health care system. GPs either treat the patients themselves or refer them to hospitals or specialists in the primary health care sector. The unique 10-digit central personal registry number (CPR number) assigned to each Danish citizen at birth and to residents upon immigration [25] allows accurate and unambiguous linkage of all medical and administrative registries at the individual level in Denmark.

### Study population

The study population was identified through the survey, "Hvordan har du det?"/ "How Are You?", a questionnaire-based public health study conducted by the Centre for Public Health (now Centre for Public Health and Quality Improvement), Central Denmark Region. In 2006, a random sample of 31,500 people, living in the region, was invited to participate in the study. Eligible participants,

1  
2  
3  
4 identified through the Civil Registration System, were 25-79 years of age, residents of the Central  
5  
6 Denmark Region, and Danish citizens with at least one parent born in Denmark. In total, 21,708  
7  
8 (69%) invited persons agreed to participate. A questionnaire and stamped return envelope was  
9  
10 delivered by mail. In order to maximize participation [26], three reminders were sent to non-  
11  
12 respondents. Those who agreed to participate completed a detailed questionnaire containing  
13  
14 approximately 400 questions on self-rated health, occurrence of chronic diseases, socioeconomic  
15  
16 factors, and lifestyle factors. The current study was based on a subsample of female respondents of  
17  
18 childbearing age, defined as age 25-44 years. In this subsample, 4,234 (71.5 %) invited women  
19  
20 agreed to participate.  
21  
22

23  
24 The survey has been described in detail elsewhere (available in Danish:  
25  
26 <http://www.cfk.rm.dk/udgivelser/befolkningsundersogelser>).  
27  
28

### 29 30 31 **Data on lifestyle factors**

32  
33 Lifestyle factors included in the study were BMI, participation in regular physical activity, diet,  
34  
35 smoking status, and alcohol intake.  
36

37  
38 BMI was calculated as self-reported weight in kilograms divided by self-reported height in meters  
39  
40 squared. BMI was categorized according to WHO criteria as underweight (BMI<18.5), normal  
41  
42 weight (BMI 18.5-24.99), overweight (BMI 25-29.99), and obese (BMI ≥30).[27] Physical activity  
43  
44 was in the questionnaire asked as participation in leisure sports or other regular physical activity  
45  
46 (yes/no). To assess diet, this health survey used a score system developed by the Research Centre  
47  
48 for Prevention and Health, the Capital Region of Denmark.[28] This included 30 different questions  
49  
50 regarding intake of fruit, vegetables, fish, and fat. By the score system the responses were  
51  
52 summarized into categories of healthy (high amount of fruit, vegetables, fish, and low amount of  
53  
54 saturated fat), reasonably healthy (median high intake of fruit, vegetables, fish, and saturated fat ),  
55  
56  
57  
58  
59  
60

1  
2  
3  
4 or unhealthy diet (low amount of fruit, vegetables, fish, and high amount of saturated fat ). Smoking  
5  
6 status was categorized as never, former, and current (daily or occasional) tobacco smoking. Finally,  
7  
8 alcohol use was in the questionnaire asked as how many drinks per week you drink. First, we  
9  
10 categorized alcohol use according to the Danish Health and Medicine Authority's  
11  
12 recommendations, *i.e.*, higher than recommended (> seven drinks weekly) or within recommended  
13  
14 guidelines ( $\leq$  seven drinks weekly).[29] Second, we categorized alcohol in > 14 drinks weekly and  
15  
16  $\leq$  14 drinks weekly.  
17  
18  
19  
20  
21  
22  
23

#### 24 **Data on SSRI and antiepileptic, anti-diabetics and antipsychotic use**

25  
26 In Denmark, antidepressants are available on prescription only. All pharmacies in the Central  
27  
28 Denmark Region are equipped with a computerized accounting system that transmits data to the  
29  
30 Danish Health Service for reimbursement of prescribed drugs. According to an agreement with  
31  
32 Aarhus University, the National Health Service subdivision of the Central Denmark Region  
33  
34 transfers individually identifiable prescription redemption data from the pharmacies to the Aarhus  
35  
36 University Prescription Database (AUPD). The AUPD contains information on the CPR number of  
37  
38 the patient, type of drug prescribed according to name and the Anatomic Therapeutic Chemical  
39  
40 classification system (ATC), and date the prescription was redeemed.[30] Data are available from  
41  
42 1996 onwards. In Denmark, a prescription for SSRI generally lasts between 28 days and 100 days  
43  
44 given that the daily use is one DDD. We classified current users of SSRIs (ATC code N06AB) as  
45  
46 those who redeemed at least one prescription within 90 days before and up to 30 days after  
47  
48 completing the survey questionnaire. We defined recent users as those who redeemed a SSRI  
49  
50 prescription in the period from 365 until 91 days before completing the questionnaire. Former users  
51  
52 were those who redeemed at least one SSRI prescription more than 365 days before completing the  
53  
54  
55  
56  
57  
58  
59  
60

questionnaire but had no prescriptions within 365 days before and up to 30 days after questionnaire completion. Never users were defined as women who never had a prescription for a SSRI.

We further defined use of anti-diabetic (ATC code A10), antiepileptic (ATC code N03), and antipsychotic (ATC code N05A) drugs as ever having redeemed a prescription on these drugs before filling in the questionnaire.

## STATISTICAL ANALYSES

We computed the prevalence of SSRI use (current, former, recent and never use) according to the available lifestyle factors and according to use of anti-diabetic, antiepileptic, and antipsychotic drugs. We then calculated prevalence ratios (PRs) and 95% confidence intervals (CIs) by the Clopper-Pearson exact method for current SSRI use and former SSRI use, comparing obese ( $BMI \geq 30$ ) to non-obese women ( $BMI < 30$ ), current smokers to non-current smokers (never and former smokers), women with alcohol intake of more than seven drinks weekly to women with alcohol intake of seven drinks or less weekly, women with alcohol intake of more than 14 drinks to women with alcohol intake of 14 drinks or less weekly, women with an unhealthy diet to women with a healthy diet (healthy and reasonably healthy), and women who participated in regular physical activity to women who did not. Women with missing data were excluded from the analyses.

In a sensitivity analysis, we added recent SSRI users to the group of current users and estimated PRs for current/recent use with 95% CIs associated with lifestyle factors. This analysis was undertaken to investigate whether potential misclassification between current and recent users could have affected our estimates.

All statistical analyses were conducted using Stata software (Release 12, StataCorp LP). The study was approved by the Danish Data Protection Agency (Record no. 2009-41-3866).



## RESULTS

In total, 4,234 women (71.5% of those invited) aged 25 - 44 years participated in the survey. Of these, 161 (3.8%) were current SSRI users, 223 (1.4%) were former users, 60 (5.3%) were recent users, and 3,790 (89.5%) were never users. We investigated the number of pregnant women in our study population as the number of women who gave birth up to nine month after filling in the questionnaire. In total, we identified 232 pregnant women. Among these, 3 (1.3%) were current users, 3 (1.3%) were recent users, and 11(4.7%) were former users. The small number of pregnant women in our study population did not allow us to examine the relation between use of SSRI and lifestyle factors in pregnancy. Table 1 shows the distribution of SSRI use (current, recent, former, and never use) according to lifestyle factors and use of anti-diabetic, antiepileptic, and antipsychotic drugs.

Table 2 shows PRs for current, current/recent, and former use of SSRIs according to the lifestyle factors. Obese women had a higher prevalence of current SSRI use than non-obese women (PR = 1.5, 95% CI: 1.0 to 2.3). Current smokers had a higher prevalence of current SSRI use than non-current smokers (PR = 1.6, 95% CI: 1.1 to 2.2). Women with an intake of alcohol of more than seven drinks weekly had a higher prevalence of current SSRI use than women whose weekly alcohol intake was seven drinks or less (PR = 1.8, 95% CI: 1.2 to 2.8). Using 14 drinks per week as level for overuse, the PR increased (PR = 2.9 , 95% CI: 1.7 to 5.3). Women with an unhealthy diet had a higher prevalence of current SSRI use than women with a healthy diet (PR= 1.7, 95% CI: 1.2 to 2.6). Women who participated in regular physical activity and women, who did not participate in regular physical activity had a similar prevalence of current SSRI use. The prevalence of former SSRI use by lifestyle factors followed the same pattern as current use. The only exception was unhealthy diet (PR = 1.1, 95% CI: 0.8 to 1.7) and alcohol intake of more than 14 drinks weekly (PR = 1.1, 95% CI: 0.5 to 2.6).

1  
2  
3  
4 In the sensitivity analysis, which added recent users to the group of current users, the PRs for SSRI  
5 use were very similar to those in the main analysis (Table 2).  
6  
7  
8  
9

## 10 **DISCUSSION**

11  
12 In our study, women with unhealthy lifestyles were more often current or former users of SSRIs  
13 compared with women with healthier lifestyles. However, the prevalence of current and former  
14 SSRI use among women not participating in regular physical activity was similar to that among  
15 women who participated in regular physical activity. Current but not former use of SSRIs was more  
16 common in women with an unhealthy diet and an alcohol intake of more than 14 drinks weekly.  
17  
18 Our study contributes to knowledge of how use of SSRIs differs according to lifestyle choices  
19 among women of childbearing age.  
20  
21

22  
23 Our study differs from earlier studies [22-24] by focusing on women of childbearing age. Therefore,  
24 our findings are applicable for assessing potential confounding in studies of birth outcomes in  
25 women using SSRIs.  
26  
27

28  
29 However, our findings are in line with the previous findings in populations consisting of both men  
30 and women, thus underlining the reliability of our results. A French questionnaire-based public  
31 health survey including 10,252 men and women over age 18 years found that both non-smokers and  
32 former smokers had 30% lower risk of being prescribed an antidepressant than current smokers.[24]  
33  
34 An American study including 43,093 men and women found that abusers of alcohol had an  
35 increased risk of major depression compared with lifetime abstainers [OR = 2.1 (95% CI: 1.3 to 3.4)  
36 for young adults not attending college and OR = 1.3 (95% CI: 1.0 to 1.6) for adults over age 30,  
37 respectively]. [22] Also, a meta-analysis including in total 58,745 men and women found that obese  
38 persons were at increased risk of developing depression over time [pooled OR = 1.55 (95% CI: 1.23  
39 to 2.01)]. [23]  
40  
41  
42  
43  
44  
45  
46  
47  
48  
49  
50  
51  
52  
53  
54  
55  
56  
57  
58  
59  
60

1  
2  
3  
4  
5  
6  
7  
8  
9 We identified use of SSRIs from a comprehensive population-based prescription database thus  
10 eliminating recall bias. This database is considered complete regarding SSRIs, as SSRIs are  
11 available by prescription only and therefore not sold as over-the-counter drugs.[30] Furthermore,  
12 our use of questionnaires permitted collection of detailed information on the selected lifestyle  
13 factors.  
14  
15  
16  
17  
18  
19

20  
21 Our study also has limitations. The study was cross-sectional and based on responses of women  
22 who volunteered to participate in a health survey. Because participants in such surveys might be  
23 more health conscious than non-participants, our cohort may not be representative of lifestyle  
24 choices in the general population. Survey participation was 69% overall and 71.5% among women  
25 aged 25 - 44 years. It is possible that non-participants may have differed from participants not only  
26 in lifestyle but also in the prevalence of major depression. This may have led us to underestimate  
27 the prevalence of SSRI use among women with unhealthy lifestyles. Furthermore, as information on  
28 lifestyle factors was self-reported, it is possible that unhealthy lifestyles were underreported. It is  
29 possible that women who are depressed/using SSRIs may report lifestyle factors differently than  
30 other women and such a potential misclassification may affect our results.  
31  
32  
33  
34  
35  
36  
37  
38  
39  
40  
41  
42  
43  
44

45 Also, redeemed prescriptions may be an imperfect measure of actual drug intake and timing. This  
46 may have led to misclassification of some non-users as SSRI users due to non-compliance. While  
47 this would not explain our finding of a higher prevalence of current SSRI use among women with  
48 an unhealthy lifestyle, it could have led us to underestimate the association.  
49  
50  
51  
52  
53  
54  
55  
56  
57  
58  
59  
60

1  
2  
3  
4 The results of this cross-sectional survey may be useful in quantifying the degree to which  
5  
6 uncontrolled confounding by lifestyle factors may affect studies of SSRI use during pregnancy.  
7  
8 However, it must be noted that women might alter their lifestyle in terms of alcohol use, smoking,  
9  
10 and diet before or during pregnancy and thus the results may not be applicable for all pregnant  
11  
12 women.  
13

14  
15  
16  
17  
18  
19 In conclusion, women with an unhealthy lifestyle were about 1.5-fold more likely to be current or  
20  
21 former SSRI users than women with a healthier lifestyle.  
22  
23  
24  
25  
26  
27  
28  
29  
30  
31  
32  
33  
34  
35  
36  
37  
38  
39  
40  
41  
42  
43  
44

45 **Table 1.** Distribution of selective serotonin reuptake inhibitor (SSRI) use in women aged 25-44  
46 years according to lifestyle factors.  
47

|                          | Current use of<br>SSRIs<br>N (%) | Recent use of<br>SSRIs<br>N (%) | Former use of<br>SSRIs<br>N (%) | Never use of<br>SSRIs<br>N (%) | Total<br>N (%)   |
|--------------------------|----------------------------------|---------------------------------|---------------------------------|--------------------------------|------------------|
| Number of women          | 161 (3.8)                        | 60 (1.4)                        | 223 (5.3)                       | 3,790 (89.5)                   | 4,234 (100)      |
| Median age and [range of | 38.0 [25.4-44.9]                 | 34.6 [25.3-44.9]                | 39.0 [25.3-44.9]                | 36.8 [25.1-44.9]               | 36.9 [25.1-44.9] |

**age]****BMI**

|           |          |          |           |              |             |
|-----------|----------|----------|-----------|--------------|-------------|
| <18.5     | 5 (5.1)  | 3 (3.1)  | 3 (3.1)   | 87 (88.8)    | 98 (100)    |
| 18.5-24.9 | 72 (3.0) | 36 (1.5) | 128 (5.2) | 2,245 (90.5) | 2,481 (100) |
| 25.0-29.9 | 49 (4.9) | 11 (1.1) | 47 (4.7)  | 890 (89.3)   | 997 (100)   |
| ≥30.0     | 30 (5.3) | 8 (1.4)  | 38 (6.8)  | 486 (86.5)   | 562 (100)   |
| Missing   | 5 (5.2)  | 2 (2.1)  | 7 (7.3)   | 82 (85.4)    | 96 (100)    |

**Smoking**

|         |          |          |          |              |             |
|---------|----------|----------|----------|--------------|-------------|
| Current | 44 (5.1) | 20 (2.3) | 67 (7.8) | 725 (84.7)   | 856 (100)   |
| Former  | 33 (3.2) | 12 (1.2) | 59 (5.5) | 912 (89.8)   | 1,016 (100) |
| Never   | 82 (3.5) | 27 (1.2) | 95 (4.1) | 2,136 (91.3) | 2,340 (100) |
| Missing | 2 (9.1)  | 1 (4.5)  | 2 (9.1)  | 17 (77.3)    | 22 (100)    |

**Diet**

|                    |          |           |           |              |             |
|--------------------|----------|-----------|-----------|--------------|-------------|
| Unhealthy          | 26 (6.1) | 12 (2.8)  | 24 (5.6)  | 366 (85.5)   | 428 (100)   |
| Reasonable healthy | 95 (3.5) | 33 (1.2)  | 144 (5.3) | 2,465 (90.1) | 2,737 (100) |
| Healthy            | 38 (3.8) | 14 (1.4)  | 48 (4.8)  | 895 (90.0)   | 995 (100)   |
| Missing            | 2 (1.5)  | 59 (44.7) | 7 (5.3)   | 64 (48.5)    | 132 (100)   |

**Intake of alcohol**

|                               |           |          |           |              |             |
|-------------------------------|-----------|----------|-----------|--------------|-------------|
| More than seven drinks weekly | 23 (6.3)  | 2 (0.5)  | 23 (6.3)  | 320 (87.0)   | 368 (100)   |
| Seven drinks or less weekly   | 124 (3.5) | 49 (1.4) | 165 (4.7) | 3,197 (90.4) | 3,535 (100) |
| More than 14 drinks weekly    | 11 (10.6) | 1 (1.0)  | 5 (4.8)   | 87 (83.7)    | 104 (100)   |
| 14 drinks or less weekly      | 136 (3.6) | 50 (1.3) | 183 (4.8) | 3,430 (90.3) | 3,799 (100) |
| Missing                       | 14 (4.2)  | 9 (2.7)  | 35 (10.6) | 273 (82.5)   | 331 (100)   |

**Participation in regular****physical activity**

|         |          |          |           |              |             |
|---------|----------|----------|-----------|--------------|-------------|
| Yes     | 77 (3.6) | 24 (1.1) | 102 (4.8) | 1,935 (90.5) | 2,138 (100) |
| No      | 83 (4.1) | 35 (1.7) | 119 (5.8) | 1,803 (88.4) | 2,040 (100) |
| Missing | 1 (1.8)  | 1 (1.8)  | 2 (3.6)   | 52 (92.9)    | 56 (100)    |

**Use of drugs other than****SSRI**

|                     |           |         |           |           |          |
|---------------------|-----------|---------|-----------|-----------|----------|
| Anti-diabetic drugs | 1 (2.1)   | 2 (4.3) | 4 (8.5)   | 40 (85.1) | 47 (100) |
| Antiepileptic drugs | 12 (15.2) | 7 (8.9) | 20 (25.3) | 40 (50.6) | 79 (100) |

|                     |           |         |           |           |          |
|---------------------|-----------|---------|-----------|-----------|----------|
| Antipsychotic drugs | 30 (31.6) | 3 (3.2) | 32 (33.7) | 30 (31.6) | 95 (100) |
|---------------------|-----------|---------|-----------|-----------|----------|

---

Diet: Healthy (high amount of fruit, vegetables, fish, and low amount of saturated fat), reasonably healthy (median high amount of fruit, vegetables, fish, and saturated fat), or unhealthy diet (low amount of fruit, vegetables, fish, and high amount of saturated fat) .

Participation in regular physical exercise: Physical activity was asked as participation in leisure sports or other regular physical activity (yes/no) in the questionnaire.

For peer review only

**Table 2.** Prevalence ratios (PRs) and 95% confidence intervals (95% CIs) for use of selective serotonin reuptake inhibitors (SSRIs) in women aged 25-44 years, according to different lifestyle factors.

| SSRI use           | PRs comparing obese vs. non-obese women<br>[95% CIs] | PRs comparing current smokers vs. non-current smokers<br>[95% CIs] | PRs comparing alcohol intake above seven drinks weekly vs. alcohol intake of seven drinks or less weekly<br>[95% CIs] | PRs comparing alcohol intake above 14 drinks weekly vs. alcohol intake of 14 drinks or less weekly<br>[95% CIs] | PRs comparing unhealthy diet vs. healthy diet<br>[95% CIs] | PRs comparing participation in regular activity vs. not participation in regular activity<br>[95% CIs] |
|--------------------|------------------------------------------------------|--------------------------------------------------------------------|-----------------------------------------------------------------------------------------------------------------------|-----------------------------------------------------------------------------------------------------------------|------------------------------------------------------------|--------------------------------------------------------------------------------------------------------|
| Never use          | 1 (reference)                                        | 1 (reference)                                                      | 1 (reference)                                                                                                         | 1 (reference)                                                                                                   | 1 (reference)                                              | 1 (reference)                                                                                          |
| Current use        | 1.5 [1.0 – 2.3]                                      | 1.6 [1.1 – 2.2]                                                    | 1.8 [1.2 – 2.8]                                                                                                       | 2.9 [1.7 – 5.3]                                                                                                 | 1.7 [1.2 – 2.6]                                            | 0.9 [0.6 – 1.2]                                                                                        |
| Current/recent use | 1.4 [1.0 – 2.0]                                      | 1.7 [1.3 – 2.2]                                                    | 1.4 [0.9 – 2.1]                                                                                                       | 2.4 [1.4 – 4.1]                                                                                                 | 1.8 [1.3 – 2.6]                                            | 0.8 [0.6 – 1.0]                                                                                        |
| Former use         | 1.4 [1.0 – 1.9]                                      | 1.8 [1.3 – 2.3]                                                    | 1.4 [0.9 – 2.1]                                                                                                       | 1.1 [0.5 – 2.6]                                                                                                 | 1.1 [0.8 – 1.7]                                            | 0.8 [0.6 – 1.0]                                                                                        |

Current/recent use: In this group, we added recent use to current use. Current use was defined as women who redeemed at least one prescription within 90 days before and up to 30 days after completing the survey questionnaire. And recent use was defined as women who redeemed a prescription in the period from 365 until 91 days before completing the questionnaire.

Diet: Healthy (high amount of fruit, vegetables, fish, and low amount of saturated fat), reasonably healthy (median high amount of fruit, vegetables, fish, and saturated fat), or unhealthy diet (low amount of fruit, vegetables, fish, and high amount of saturated fat).

Participation in regular physical exercise: Physical activity was asked as participation in leisure sports or other regular physical activity (yes/no) in the questionnaire.

1  
2  
3  
4 **Acknowledgements:** We wish to thank all the participants who helped us conduct this study by  
5 completing questionnaires.  
6  
7  
8  
9  
10

11  
12  
13 **Funding:** This research was supported by the Clinical Epidemiology Research Foundation, Aarhus  
14 University Hospital, Denmark. The Department of Clinical Epidemiology, Aarhus University  
15 Hospital, receives funding for other studies from companies in the form of research grants to (and  
16 administered by) Aarhus University. None of these studies have any relation to the present study.  
17  
18  
19  
20  
21

22  
23  
24 **Competing interests:** None declared.  
25  
26

27 **Data sharing statement:** No additional data available.  
28  
29  
30  
31  
32  
33  
34  
35  
36  
37  
38  
39  
40  
41  
42  
43  
44  
45  
46  
47  
48  
49  
50  
51  
52  
53  
54  
55  
56  
57  
58  
59  
60



**REFERENCES**

1 Bennett HA, Einarson A, Taddio A, et al. Prevalence of depression during pregnancy; systematic  
review. *Obstet Gynecol* 2004;**103**:698-709.

2 Bennett HA, Einarson A, Taddio A, et al. Depression during Pregnancy: Overview of Clinical  
Factors. *Clin Drug Investig* 2004;**24**:157-179.

3 Zuckerman B, Amaro H, Baucher H, et al. Depressive symptoms during pregnancy: relationship  
to poor health behaviors. *Am J Obstet gynecol* 1989;**160**:1107-1111.

4 Lejoyeux M, Leon E, Rouillon F. Prevalence and risk factors of suicide and attempted suicide.  
*Encephale* 1994;**20**:495-503.

5 Bonari L, Pinto N, Ahn E, et al. Perinatal risks of untreated depression during pregnancy. *Can J  
Psychiatry* 2004;**49**:726-735.

6 Grote NK, Bridge JA, Gavin AR, et al. A meta-analysis of depression during pregnancy and the  
risk of preterm birth, low birth weight, and intrauterine growth restriction. *Arch Gen Psychiatry*  
2010;**67**:1012-1024.

7 Cooper WO, Willy ME, Pont SJ, et al. Increasing use of antidepressants in pregnancy. *Am J  
Obstet Gynecol* 2007;**196**:544.e1-e5.

8 Andrade SE, Raebel MA, Brown J, et al. Use of antidepressant medications during pregnancy: a  
multisite study. *Am J Obstet Gynecol* 2008;**198**:194.e1-e5.

9 Available at: [http://www.sst.dk/Nyhedscenter/Nyheder/2007/nye\\_tal\\_20-07.aspx](http://www.sst.dk/Nyhedscenter/Nyheder/2007/nye_tal_20-07.aspx) . Accesed 3/29  
2013.

1  
2  
3  
4 10 Wen SW, Yang Q, Garner P, et al. Selective serotonin reuptake inhibitors and adverse  
5 pregnancy outcomes. *Am J Obstet Gynecol* 2006;**194**:961-966.  
6  
7

8  
9 11 Lund N, Pedersen LH, Henriksen TB. Selective serotonin reuptake inhibitor exposure in utero  
10 and pregnancy outcomes. *Arch Pediatr Adolesc Med* 2009;**163**:949-954.  
11  
12

13  
14 12 Reis M, Kallen B. Delivery outcome after maternal use of antidepressant drugs in pregnancy: an  
15 update using Swedish data. *Psychol Med* 2010;**40**:1723-1733.  
16  
17

18  
19 13 Pedersen LH, Henriksen TB, Vestergaard M, et al. Selective serotonin reuptake inhibitors in  
20 pregnancy and congenital malformations: population based cohort study. *BMJ* 2009;**339**:b3569.  
21  
22

23  
24 14 Kieler H, Artama M, Engeland A, et al. Selective serotonin reuptake inhibitors during pregnancy  
25 and risk of persistent pulmonary hypertension in the newborn: population based cohort study from  
26 the five Nordic countries. *BMJ* 2012;**339**:d8012.  
27  
28  
29

30  
31 15 Jimenez-Solem E, Andersen JT, Petersen M, et al. Exposure to selective serotonin reuptake  
32 inhibitors and the risk of congenital malformations: a nationwide cohort study. *BMJ Open*  
33 2012;**2**:e001148  
34  
35  
36

37  
38 16 Reis M, Kallen B. Combined use of selective serotonin reuptake inhibitors and  
39 sedatives/hypnotics during pregnancy: risk of relatively severe congenital malformations or cardiac  
40 defects: A register study. *BMJ Open* 2013;**3**.  
41  
42  
43  
44

45  
46 17 Alwan S, Reefhuis J, Rasmussen SA, et al. Use of selective serotonin-reuptake inhibitors in  
47 pregnancy and the risk of birth defects. *N Engl J Med* 2007;**356**:2684-2692.  
48  
49  
50

51  
52 18 Rogers JM. Tobacco and pregnancy: overview of exposures and effects. *Birth Defects Res C*  
53 *embryo Today* 2008;**84**:1-15.  
54  
55  
56

1  
2  
3  
4 19 Dennedy MC, Avalos G, O'Reilly MW, et al. The impact of maternal obesity on gestational  
5  
6 outcomes. *Ir Med J* 2012;**105**:23-25.  
7

8  
9 20 Erickson AC, Arbour LT. Heavy smoking during pregnancy as a marker for other risk factors of  
10  
11 adverse birth outcomes: a population-based study in British Columbia, Canada. *BMC Public*  
12  
13 *Health* 2012;**12**:102.  
14

15  
16 21 Mateja WA, Nelson DB, Kroelinger CD, et al. The association between maternal alcohol use  
17  
18 and smoking in early pregnancy and congenital cardiac defects. *J Womens Health (Larchmt)*  
19  
20 2012;**21**:26-34.  
21  
22

23  
24 22 Dawson DA, Grant BF, Stinson FS, et al. Psychopathology associated with drinking and alcohol  
25  
26 use disorders in the college and general adult populations. *Drug Alcohol Depend* 2005;**77**:139-  
27  
28 150.  
29

30  
31 23 Luppino FS, de Wit LM, Bouvy PF, et al. Overweight, obesity, and depression: a systematic  
32  
33 review and meta-analysis of longitudinal studies. *Arch Gen Psychiatry* 2010;**67**:220-229.  
34  
35

36  
37 24 Cheron-Launay M, Le Faou AL, Sevilla-Dedieu C, et al. Smoking and the consumption of  
38  
39 antidepressants, anxiolytics and hypnotic drugs: results of a large, French epidemiological study in  
40  
41 2005. *Addict Behav* 2011;**36**:743-748.  
42  
43

44 25 Pedersen CB. The Danish Civil Registration System. *Scand J Public Health* 2011;**39**:22-25.  
45  
46

47 26 Edwards P, Roberts I, Clarke M, et al. Increasing response rates to postal questionnaires:  
48  
49 systematic review. *BMJ* 2002;**324**:1183.  
50  
51

52 27 Available at: [http://apps.who.int/bmi/index.jsp?introPage=intro\\_3.html](http://apps.who.int/bmi/index.jsp?introPage=intro_3.html) . Accessed 3/29 2013.  
53  
54  
55  
56  
57  
58  
59  
60

1  
2  
3  
4 28 Toft U, Kristoffersen LH, Lau C, et al. The Dietary Quality Score: validation and association  
5  
6 with cardiovascular risk factors: the Inter99 study. *Eur J Clin Nutr* 2007;**61**:270-278.  
7

8  
9 29 Available at: [www.sst.dk/Sundhed%20og%20forebyggelse/Alkohol.aspx](http://www.sst.dk/Sundhed%20og%20forebyggelse/Alkohol.aspx). Accessed 5/28 2013.  
10

11  
12 30 Ehrenstein V, Antonsen S, Pedersen L. Existing data sources for clinical epidemiology: Aarhus  
13  
14 University Prescription Database. *Clin Epidemiol* 2010;**2**:273-279.  
15  
16  
17  
18  
19  
20  
21  
22  
23  
24  
25  
26  
27  
28  
29  
30  
31  
32  
33  
34  
35  
36  
37  
38  
39  
40  
41  
42  
43  
44  
45  
46  
47  
48  
49  
50  
51  
52  
53  
54  
55  
56  
57  
58  
59  
60

1  
2  
3  
4 **Use of selective serotonin reuptake inhibitors and lifestyle among women of childbearing age:**  
5  
6

7 **A Danish cross-sectional survey**  
8

9  
10 Kristina Laugesen<sup>1</sup>, Ane Birgitte Telén Andersen<sup>1</sup>, Mette Nørgaard<sup>1</sup>, Rikke Beck Nielsen<sup>1</sup>, Reimar  
11  
12 Wernich Thomsen<sup>1</sup>, Finn Breinholt Larsen<sup>2</sup>, Henrik Toft Sørensen<sup>1</sup>  
13  
14

15  
16  
17  
18 <sup>1</sup> Department of Clinical Epidemiology, Institute of Clinical Medicine, Aarhus University Hospital,  
19  
20 8200 Aarhus, Denmark  
21

22  
23 <sup>2</sup> Public Health and Quality Improvement, Central Denmark Region, 8200 Aarhus, Denmark  
24  
25  
26  
27

28 **Corresponding author:** Kristina Laugesen, Department of Clinical Epidemiology, Institute of  
29  
30 Clinical Medicine, Aarhus University Hospital, Olof Palmes Allé 43-45, 8200 Aarhus N, Denmark.  
31  
32 Phone: +4587168063; Fax: +4587167215; E-mail: kristina.laugesen@studmed.au.dk  
33  
34  
35  
36  
37  
38  
39  
40

41 **Keywords:** antidepressants, lifestyle, women, fertile  
42  
43  
44  
45  
46  
47  
48  
49  
50  
51  
52  
53  
54  
55  
56  
57  
58  
59  
60

**ABSTRACT**

**Objective** To examine the use of selective serotonin reuptake inhibitors (SSRIs) among Danish women of childbearing age according to lifestyle factors.

**Design** Cross-sectional survey.

**Setting** The Central Denmark Region.

**Participants** 4,234 women (71.5% of the invited) aged 25-44 years who participated in a public health survey in 2006.

**Outcome measures** Prevalence and prevalence ratios (PRs) of current and former SSRI use among women characterized by selected lifestyle factors. We obtained information on SSRI use through linkage to the Aarhus University Prescription Database covering all pharmacies in the region.

**Results** Of 4,234 women in the study, 161 (3.8%) were current SSRI users, 60 (1.4%) were recent users, 223 (5.3%) were former users, and 3,790 (89.5%) were never users. Current use of SSRIs was more prevalent in obese women than in non-obese women (PR = 1.5, 95% CI: 1.0 to 2.3), in current smokers compared with non-current smokers (PR = 1.6, 95% CI: 1.1 to 2.2), in women who drank more than seven+4 alcoholic drinks weekly compared with women who drank seven+4 or fewer drinks weekly (PR = 1.8, 95% CI: 1.2 to 2.8), and in women with an unhealthy diet compared with women with a healthy diet (PR = 1.7, 95% CI: 1.2 to 2.6). Prevalence of former use of SSRIs was similarly increased except in those with an unhealthy diet (PR= 1.1, 95% CI: 0.8 to 1.7). SSRI use did not differ according to participation in regular physical activity.

**Conclusion** Women with an unhealthy lifestyle were about 1.5-fold more likely to be current or former users of SSRIs than those with a healthy lifestyle. These findings may be useful for

1  
2  
3  
4 quantitative assessment of the contribution of lifestyle factors to uncontrolled confounding in  
5  
6 studies of SSRI use in pregnancy.  
7  
8  
9

## 10 11 **ARTICLE SUMMARY** 12

### 13 14 15 **Article focus**

- 16 • To examine whether current and former use of SSRIs differ according to lifestyle factors  
17 among women of childbearing age.  
18  
19  
20  
21  
22  
23  
24

### 25 26 **Key messages** 27

- 28 • Of 4,234 women aged 25-44 years participating in a public health survey, 161 (3.8%) were  
29 current SSRI users, 60 (1.4%) were recent users, and 223 (5.3%) were former users.  
30  
31
- 32 • Current and former use of SSRIs were at least 1.5-fold or more prevalent in women who  
33 were obese, who were current smokers, or who had a weekly alcohol intake above seven  
34 drinks higher than recommended weekly alcohol intake, as compared with women with a  
35 healthier lifestyle. Current but not former use of SSRIs was common in women with  
36 an unhealthy diet and in women with intake of alcohol of more than 14 drinks weekly. SSRI  
37 use did not differ much according to participation in regular physical activity.  
38  
39  
40  
41  
42  
43  
44  
45  
46  
47  
48

### 49 50 **Strengths and limitations of this study**

- 51 • SSRI use was identified from a comprehensive population-based prescription database, thus  
52 eliminating recall bias. The high quality and completeness of data in this database has been  
53 documented. Detailed information on lifestyle factors was available from questionnaires.  
54  
55  
56  
57  
58  
59  
60

- Because the study was based on volunteers in a health survey (participation rate of women of childbearing age = 71.5%), participants may have been more health conscious than non-participants.
- Filled prescriptions may not be an entirely perfect measure of actual drug intake and its timing and thus may have led to some misclassification of SSRI use.

For peer review only



## INTRODUCTION

More than 10% of pregnant women experience depression.[1] In deciding to initiate antidepressant drug treatment in pregnant women, potential negative effects of untreated depression on the mother and fetus [2-6] must be weighed against the risk of adverse pregnancy outcomes associated with in utero exposure to antidepressant drugs.[2]

Selective serotonin reuptake inhibitors (SSRIs) constitute the most commonly used class of antidepressants. Use of these drugs has substantially increased [7,8] in recent years. In Denmark, 2.4% of all pregnant women were treated with SSRIs in 2006, compared with 0.3% in 1997.[9] In a number of studies, SSRI use has been associated with adverse pregnancy outcomes including preterm birth, poor neonatal adaptation, low birth weight, persistent pulmonary hypertension, and cardiac malformations.[10-15]. One study reported an elevated risk of risk of cardiac malformations after prenatal exposure to SSRI, but concluded that this was due to unaccounted confounding.[15]

However, other studies did not find such associations.[16,17] Studies investigating these associations often have lacked information on maternal lifestyle factors, such as smoking,[10] alcohol consumption,[12-14] and body mass index (BMI),[10,13,14]. Thus, they may have been biased by uncontrolled confounding, complicating interpretation of their results.

Unhealthy lifestyle choices during pregnancy, including smoking, alcohol consumption, and obesity, are known to be associated with increased risk of adverse pregnancy outcomes.[18-21] Still, few studies have investigated whether use of antidepressants differs according to lifestyle factors. Available studies have reported that depression and antidepressant use are more frequent among smokers, alcohol consumers, and obese people.[22-24] In the current study, we used data from a Danish public health survey to examine the relation between SSRI use and lifestyle among women of childbearing age.

## METHODS

### Study design

We conducted a cross-sectional study based on a 2006 public health survey administered in the Central Denmark region.

### Setting

Denmark has 5.5 million inhabitants and is administratively divided into five regions. We conducted this study in one of these regions, the Central Denmark Region, with a population of about 1.2 million people. The Danish healthcare system provides tax-supported healthcare to all residents, guaranteeing free and unfettered access to primary and secondary care. Except for emergencies, general practitioners (GPs) are patients' initial contact with the health care system. GPs either treat the patients themselves or refer them to hospitals or specialists in the primary health care sector.

The unique 10-digit central personal registry number (CPR number) assigned to each Danish citizen at birth and to residents upon immigration [25] allows accurate and unambiguous linkage of all medical and administrative registries at the individual level in Denmark.

### Study population

The study population was identified through the survey, "Hvordan har du det?"/ "How Are You?", a questionnaire-based public health study conducted by the Centre for Public Health (now Centre for Public Health and Quality Improvement), Central Denmark Region. In 2006, a random sample of 31,500 people, living in the region, was invited to participate in the study. Eligible participants,

1  
2  
3  
4 identified through the Civil Registration System, were 25-79 years of age, residents of the Central  
5  
6 Denmark Region, and Danish citizens with at least one parent born in Denmark. In total, 21,708  
7  
8 (69%) invited persons agreed to participate. A questionnaire and stamped return envelope was  
9  
10 delivered by mail. In order to maximize participation [26], three reminders were sent to non-  
11  
12 respondents. Those who agreed to participate completed a detailed questionnaire containing  
13  
14 approximately 400 questions on self-rated health, occurrence of chronic diseases, socioeconomic  
15  
16 factors, and lifestyle factors. The current study was based on a subsample of female respondents of  
17  
18 childbearing age, defined as age 25-44 years. In this subsample, 4,234 (71.5 %) invited women  
19  
20 agreed to participate.  
21  
22

23  
24 The survey has been described in detail elsewhere (available in Danish:  
25  
26 <http://www.cfk.rm.dk/udgivelser/befolkningsundersogelser>).  
27  
28  
29  
30

### 31 **Data on lifestyle factors**

32  
33 Lifestyle factors included in the study were BMI, [participation in regular physical activity](#), diet,  
34  
35 smoking status, and alcohol intake.  
36

37  
38 BMI was calculated as self-reported weight in kilograms divided by self-reported height in meters  
39  
40 squared. BMI was categorized according to WHO criteria as underweight (BMI<18.5), normal  
41  
42 weight (BMI 18.5-24.99), overweight (BMI 25-29.99), and obese (BMI ≥30).[27] Physical activity  
43  
44 was [in the questionnaire asked](#) as participation in leisure sports or other regular physical activity  
45  
46 (yes/no). [To assess diet, this health survey used a score system developed by the Research Centre](#)  
47  
48 [for Prevention and Health, the Capital Region of Denmark.\[28\] This](#) included 30 different questions  
49  
50 [regarding intake of fruit, vegetables, fish, and fat. By the score system the](#) responses were  
51  
52 summarized into categories of healthy ([high amount of fruit, vegetables, fish, and low amount of](#)  
53  
54 [saturated fat](#)), reasonably healthy ([median high intake of fruit, vegetables, fish, and saturated fat](#) ),  
55  
56  
57  
58  
59  
60

1  
2  
3  
4 or unhealthy diet (low amount of fruit, vegetables, fish, and high amount of saturated fat). Smoking  
5  
6 status was categorized as never, former, and current (daily or occasional) tobacco smoking. Finally,  
7  
8 alcohol use was in the questionnaire asked as how many drinks per week you drink. First, we  
9  
10 categorized alcohol use according to the Danish Health and Medicine Authority's  
11  
12 recommendations, *i.e.*, higher than recommended (> seven drinks weekly) or within recommended  
13  
14 guidelines ( $\leq$  seven drinks weekly).[29] Second, we categorized alcohol in > 14 drinks weekly and  
15  
16  $\leq$  14 drinks weekly.  
17  
18  
19

#### 20 21 22 23 24 **Data on SSRI and antiepileptic, anti-diabetics and antipsychotic use**

25  
26 In Denmark, antidepressants are available on prescription only. All pharmacies in the Central  
27  
28 Denmark Region are equipped with a computerized accounting system that transmits data to the  
29  
30 Danish Health Service for reimbursement of prescribed drugs. According to an agreement with  
31  
32 Aarhus University, the National Health Service subdivision of the Central Denmark Region  
33  
34 transfers individually identifiable prescription redemption data from the pharmacies to the Aarhus  
35  
36 University Prescription Database (AUPD). The AUPD contains information on the CPR number of  
37  
38 the patient, type of drug prescribed according to name and the Anatomic Therapeutic Chemical  
39  
40 classification system (ATC), and date the prescription was redeemed.[30] Data are available from  
41  
42 1996 onwards. In Denmark, a prescription for SSRI generally lasts between 28 days and 100 days  
43  
44 given that the daily use is one DDD. We classified current users of SSRIs (ATC code N06AB) as  
45  
46 those who redeemed at least one prescription within 90 days before and up to 30 days after  
47  
48 completing the survey questionnaire. We defined recent users as those who redeemed a SSRI  
49  
50 prescription in the period from 365 until 91 days before completing the questionnaire. Former users  
51  
52 were those who redeemed at least one SSRI prescription more than 365 days before completing the  
53  
54  
55  
56  
57  
58  
59  
60

questionnaire but had no prescriptions within 365 days before and up to 30 days after questionnaire completion. Never users were defined as women who never had a prescription for a SSRI.

We further defined use of anti-diabetic (ATC code A10), antiepileptic (ATC code N03), and antipsychotic (ATC code N05A) drugs as ever having redeemed a prescription on these drugs before filling in the questionnaire.

## STATISTICAL ANALYSES

We computed the prevalence of SSRI use (current, former, recent and never use) according to the available lifestyle factors and according to use of anti-diabetic, antiepileptic, and antipsychotic drugs. We then calculated prevalence ratios (PRs) and 95% confidence intervals (CIs) by the Clopper-Pearson exact method for current SSRI use and former SSRI use, comparing obese (BMI  $\geq$  30) to non-obese women (BMI < 30), current smokers to non-current smokers (never and former smokers), women with alcohol intake of more than seven drinks weekly ~~recommended alcohol use~~ to women with alcohol intake of seven drinks or less weekly~~who used alcohol within the recommended amount~~, women with alcohol intake of more than 14 drinks to women with alcohol intake of 14 drinks or less weekly, women with an unhealthy diet to women with a healthy diet (healthy and reasonably healthy), and women who participated in regular physical activity to women who did not. Women with missing data were excluded from the analyses.

In a sensitivity analysis, we added recent SSRI users to the group of current users and estimated PRs for current/recent use with 95% CIs associated with lifestyle factors. This analysis was undertaken to investigate whether potential misclassification between current and recent users could have affected our estimates.

All statistical analyses were conducted using Stata software (Release 12, StataCorp LP). The study was approved by the Danish Data Protection Agency (Record no. 2009-41-3866).

## RESULTS

In total, 4,234 women (71.5% of those invited) aged 25 - 44 years participated in the survey. Of these, 161 (3.8%) were current SSRI users, 223 (1.4%) were former users, 60 (5.3%) were recent users, and 3,790 (89.5%) were never users. We investigated the number of pregnant women in our study population as the number of women who gave birth up to nine month after filling in the questionnaire. In total, we identified 232 pregnant women. Among these, 3 (1.3%) were current users, 3 (1.3%) were recent users, and 11(4.7%) were former users. The small number of pregnant women in our study population did not allow us to examine the relation between use of SSRI and lifestyle factors in pregnancy. Table 1 shows the distribution of SSRI use (current, recent, former, and never use) according to lifestyle factors and use of anti-diabetic, antiepileptic, and antipsychotic drugs.

Table 2 shows PRs for current, current/recent, and former use of SSRIs according to the lifestyle factors. Obese women had a higher prevalence of current SSRI use than non-obese women (PR = 1.5, 95% CI: 1.0 to 2.3). Current smokers had a higher prevalence of current SSRI use than non-current smokers (PR = 1.6, 95% CI: 1.1 to 2.2). Women with an intake of alcohol of more than seven drinks weekly higher than recommended weekly alcohol intake had a higher prevalence of current SSRI use than women whose weekly alcohol intake was seven drinks or less within the recommendations (PR = 1.8, 95% CI: 1.2 to 2.8). Using 14 drinks per week as level for overuse, the PR increased (PR = 2.9 , 95% CI: 1.7 to 5.3). Women with an unhealthy diet had a higher prevalence of current SSRI use than women with a healthy diet (PR= 1.7, 95% CI: 1.2 to 2.6).

Women who participated in regular physical activity and women, who did not participate in regular

1  
2  
3  
4 | physical activity had a similar prevalence of current SSRI use. The prevalence of former SSRI use  
5  
6 | by lifestyle factors followed the same pattern as current use. The only exception was unhealthy diet  
7  
8 | (PR = 1.1, 95% CI: 0.8 to 1.7) and alcohol intake of more than 14 drinks weekly (PR = 1.1, 95% CI:  
9  
10 | 0.5 to 2.6).  
11

12 | In the sensitivity analysis, which added recent users to the group of current users, the PRs for SSRI  
13  
14 | use were very similar to those in the main analysis (Table 2).  
15  
16

## 17 18 19 **DISCUSSION**

20  
21 | In our study, women with unhealthy lifestyles were more often current or former users of SSRIs  
22  
23 | compared with women with healthier lifestyles. However, the prevalence of current and former  
24  
25 | SSRI use among women not participating in regular physical activity was similar to that among  
26  
27 | women who participated in regular physical activity. Current but not former use of SSRIs was more  
28  
29 | common in women with an unhealthy diet and an alcohol intake of more than 14 drinks weekly.  
30  
31

32 | Our study contributes to knowledge of how use of SSRIs differs according to lifestyle choices  
33  
34 | among women of childbearing age.  
35

36  
37 | Our study differs from earlier studies [22-24] by focusing on women of childbearing age. Therefore,  
38  
39 | our findings are applicable for assessing potential confounding in studies of birth outcomes in  
40  
41 | women using SSRIs.  
42

43 | However, our findings are in line with the previous findings in populations consisting of both men  
44  
45 | and women, thus underlining the reliability of our results. A French questionnaire-based public  
46  
47 | health survey including 10,252 men and women over age 18 years found that both non-smokers and  
48  
49 | former smokers had 30% lower risk of being prescribed an antidepressant than current smokers.[24]  
50

51 | An American study including 43,093 men and women found that abusers of alcohol had an  
52  
53 | increased risk of major depression compared with lifetime abstainers [OR = 2.1 (95% CI: 1.3 to 3.4)  
54  
55

1  
2  
3  
4 for young adults not attending college and OR = 1.3 (95% CI: 1.0 to 1.6) for adults over age 30,  
5  
6 respectively].[22] Also, a meta-analysis including in total 58,745 men and women found that obese  
7  
8 persons were at increased risk of developing depression over time [pooled OR = 1.55 (95% CI: 1.23  
9  
10 to 2.01)].[23]  
11  
12

13  
14  
15  
16  
17 We identified use of SSRIs from a comprehensive population-based prescription database thus  
18  
19 eliminating recall bias. This database is considered complete regarding SSRIs, as SSRIs are  
20  
21 available by prescription only and therefore not sold as over-the-counter drugs. [30] Furthermore,  
22  
23 our use of questionnaires permitted collection of detailed information on the selected lifestyle  
24  
25 factors.  
26  
27

28  
29  
30 Our study also has limitations. The study was cross-sectional and based on responses of women  
31  
32 who volunteered to participate in a health survey. Because participants in such surveys might be  
33  
34 more health conscious than non-participants, our cohort may not be representative of lifestyle  
35  
36 choices in the general population. Survey participation was 69% overall and 71.5% among women  
37  
38 aged 25 - 44 years. It is possible that non-participants may have differed from participants not only  
39  
40 in lifestyle but also in the prevalence of major depression. This may have led us to underestimate  
41  
42 the prevalence of SSRI use among women with unhealthy lifestyles. Furthermore, as information on  
43  
44 lifestyle factors was self-reported, it is possible that unhealthy lifestyles were underreported. It is  
45  
46 possible that women who are depressed/using SSRIs may report lifestyle factors differently than  
47  
48 other women and such a potential misclassification may affect our results.  
49  
50  
51  
52

53  
54 Also, redeemed prescriptions may be an imperfect measure of actual drug intake and timing. This  
55  
56 may have led to misclassification of some non-users as SSRI users due to non-compliance. While  
57  
58  
59  
60



1  
2  
3  
4 this would not explain our finding of a higher prevalence of current SSRI use among women with  
5  
6 an unhealthy lifestyle, it could have led us to underestimate the association.  
7  
8  
9

10 The results of this cross-sectional survey may be useful in quantifying the degree to which  
11 uncontrolled confounding by lifestyle factors may affect studies of SSRI use during pregnancy.  
12  
13 However, it must be noted that women might alter their lifestyle in terms of alcohol use, smoking,  
14 and diet before or during pregnancy and thus the results may not be applicable for all pregnant  
15 women.  
16  
17  
18  
19  
20  
21  
22  
23  
24  
25

26 In conclusion, women with an unhealthy lifestyle were about 1.5-fold more likely to be current or  
27  
28 former SSRI users than women with a healthier lifestyle. ~~These results may be useful in quantifying~~  
29 ~~the degree to which uncontrolled confounding by lifestyle factors may affect studies of SSRI use~~  
30 ~~during pregnancy.~~  
31  
32  
33  
34  
35  
36  
37  
38  
39  
40  
41  
42  
43  
44  
45  
46  
47  
48  
49  
50  
51  
52  
53  
54  
55  
56  
57  
58  
59  
60

**Table 1.** Distribution of selective serotonin reuptake inhibitor (SSRI) use in women aged 25-44 years according to lifestyle factors.

|                                      | Current use of<br>SSRIs<br>N (%) | Recent use of<br>SSRIs<br>N (%) | Former use of<br>SSRIs<br>N (%) | Never use of<br>SSRIs<br>N (%) | Total<br>N (%)          |
|--------------------------------------|----------------------------------|---------------------------------|---------------------------------|--------------------------------|-------------------------|
| <b>Number of women</b>               | 161 (3.8)                        | 60 (1.4)                        | 223 (5.3)                       | 3,790 (89.5)                   | 4,234 (100)             |
| <b>Median age and [range of age]</b> | <u>38.0 [25.4-44.9]</u>          | <u>34.6 [25.3-44.9]</u>         | <u>39.0 [25.3-44.9]</u>         | <u>36.8 [25.1-44.9]</u>        | <u>36.9 [25.1-44.9]</u> |
| <b>BMI</b>                           |                                  |                                 |                                 |                                |                         |
| <18.5                                | 5 (5.1)                          | 3 (3.1)                         | 3 (3.1)                         | 87 (88.8)                      | 98 (100)                |
| 18.5-24.9                            | 72 (3.0)                         | 36 (1.5)                        | 128 (5.2)                       | 2,245 (90.5)                   | 2,481 (100)             |
| 25.0-29.9                            | 49 (4.9)                         | 11 (1.1)                        | 47 (4.7)                        | 890 (89.3)                     | 997 (100)               |
| ≥30.0                                | 30 (5.3)                         | 8 (1.4)                         | 38 (6.8)                        | 486 (86.5)                     | 562 (100)               |
| Missing                              | 5 (5.2)                          | 2 (2.1)                         | 7 (7.3)                         | 82 (85.4)                      | 96 (100)                |
| <b>Smoking</b>                       |                                  |                                 |                                 |                                |                         |
| Current                              | 44 (5.1)                         | 20 (2.3)                        | 67 (7.8)                        | 725 (84.7)                     | 856 (100)               |
| Former                               | 33 (3.2)                         | 12 (1.2)                        | 59 (5.5)                        | 912 (89.8)                     | 1,016 (100)             |
| Never                                | 82 (3.5)                         | 27 (1.2)                        | 95 (4.1)                        | 2,136 (91.3)                   | 2,340 (100)             |
| Missing                              | 2 (9.1)                          | 1 (4.5)                         | 2 (9.1)                         | 17 (77.3)                      | 22 (100)                |
| <b>Diet</b>                          |                                  |                                 |                                 |                                |                         |
| Unhealthy                            | 26 (6.1)                         | 12 (2.8)                        | 24 (5.6)                        | 366 (85.5)                     | 428 (100)               |
| Reasonable healthy                   | 95 (3.5)                         | 33 (1.2)                        | 144 (5.3)                       | 2,465 (90.1)                   | 2,737 (100)             |
| Healthy                              | 38 (3.8)                         | 14 (1.4)                        | 48 (4.8)                        | 895 (90.0)                     | 995 (100)               |
| Missing                              | 2 (1.5)                          | 59 (44.7)                       | 7 (5.3)                         | 64 (48.5)                      | 132 (100)               |
| <b>Intake of alcohol</b>             |                                  |                                 |                                 |                                |                         |
| More than <u>seven</u> drinks weekly | 23 (6.3)                         | 2 (0.5)                         | 23 (6.3)                        | 320 (87.0)                     | 368 (100)               |
| <u>Seven</u> drinks or less weekly   | 124 (3.5)                        | 49 (1.4)                        | 165 (4.7)                       | 3,197 (90.4)                   | 3,535 (100)             |
| <u>More than 14 drinks weekly</u>    | <u>11 (10.6)</u>                 | <u>1 (1.0)</u>                  | <u>5 (4.8)</u>                  | <u>87 (83.7)</u>               | <u>104 (100)</u>        |
| <u>14 drinks or less weekly</u>      | <u>136 (3.6)</u>                 | <u>50 (1.3)</u>                 | <u>183 (4.8)</u>                | <u>3,430 (90.3)</u>            | <u>3,799 (100)</u>      |
| Missing                              | 14 (4.2)                         | 9 (2.7)                         | 35 (10.6)                       | 273 (82.5)                     | 331 (100)               |
| <b>Participation in regular</b>      |                                  |                                 |                                 |                                |                         |

**physical activity**

|         |          |          |           |              |             |
|---------|----------|----------|-----------|--------------|-------------|
| Yes     | 77 (3.6) | 24 (1.1) | 102 (4.8) | 1,935 (90.5) | 2,138 (100) |
| No      | 83 (4.1) | 35 (1.7) | 119 (5.8) | 1,803 (88.4) | 2,040 (100) |
| Missing | 1 (1.8)  | 1 (1.8)  | 2 (3.6)   | 52 (92.9)    | 56 (100)    |

**Use of drugs other than****SSRI**

|                            |                  |                |                  |                  |                 |
|----------------------------|------------------|----------------|------------------|------------------|-----------------|
| <u>Anti-diabetic drugs</u> | <u>1 (2.1)</u>   | <u>2 (4.3)</u> | <u>4 (8.5)</u>   | <u>40 (85.1)</u> | <u>47 (100)</u> |
| <u>Antiepileptic drugs</u> | <u>12 (15.2)</u> | <u>7 (8.9)</u> | <u>20 (25.3)</u> | <u>40 (50.6)</u> | <u>79 (100)</u> |
| <u>Antipsychotic drugs</u> | <u>30 (31.6)</u> | <u>3 (3.2)</u> | <u>32 (33.7)</u> | <u>30 (31.6)</u> | <u>95 (100)</u> |

Diet: Healthy (high amount of fruit, vegetables, fish, and low amount of saturated fat), reasonably healthy (median high amount of fruit, vegetables, fish, and saturated fat), or unhealthy diet (low amount of fruit, vegetables, fish, and high amount of saturated fat).

Participation in regular physical exercise: Physical activity was asked as participation in leisure sports or other regular physical activity (yes/no) in the questionnaire.

**Table 2.** Prevalence ratios (PRs) and 95% confidence intervals (95% CIs) for use of selective serotonin reuptake inhibitors (SSRIs) in women aged 25-44 years, according to different lifestyle factors.

| SSRI use           | PRs comparing obese vs. non-obese women<br>[95% CIs] | PRs comparing current smokers vs. non-current smokers<br>[95% CIs] | PRs comparing alcohol intake above <b>seven</b> drinks weekly vs. alcohol intake of <b>seven</b> drinks or less weekly<br>[95% CIs] | <b>PRs comparing alcohol intake above 14 drinks weekly vs. alcohol intake of 14 drinks or less weekly</b><br>[95% CIs] | PRs comparing unhealthy diet vs. healthy diet<br>[95% CIs] | PRs comparing <b>participation in regular activity</b> vs. <b>not participation in regular activity</b><br>[95% CIs] |
|--------------------|------------------------------------------------------|--------------------------------------------------------------------|-------------------------------------------------------------------------------------------------------------------------------------|------------------------------------------------------------------------------------------------------------------------|------------------------------------------------------------|----------------------------------------------------------------------------------------------------------------------|
| Never use          | 1 (reference)                                        | 1 (reference)                                                      | 1 (reference)                                                                                                                       | <b>1 (reference)</b>                                                                                                   | 1 (reference)                                              | 1 (reference)                                                                                                        |
| Current use        | 1.5 [1.0 – 2.3]                                      | 1.6 [1.1 – 2.2]                                                    | 1.8 [1.2 – 2.8]                                                                                                                     | <b>2.9 [1.7 – 5.3]</b>                                                                                                 | 1.7 [1.2 – 2.6]                                            | 0.9 [0.6 – 1.2]                                                                                                      |
| Current/recent use | 1.4 [1.0 – 2.0]                                      | 1.7 [1.3 – 2.2]                                                    | 1.4 [0.9 – 2.1]                                                                                                                     | <b>2.4 [1.4 – 4.1]</b>                                                                                                 | 1.8 [1.3 – 2.6]                                            | 0.8 [0.6 – 1.0]                                                                                                      |
| Former use         | 1.4 [1.0 – 1.9]                                      | 1.8 [1.3 – 2.3]                                                    | 1.4 [0.9 – 2.1]                                                                                                                     | <b>1.1 [0.5 – 2.6]</b>                                                                                                 | 1.1 [0.8 – 1.7]                                            | 0.8 [0.6 – 1.0]                                                                                                      |

Current/recent use: In this group, we added recent use to current use. Current use was defined as women who redeemed at least one prescription within 90 days before and up to 30 days after completing the survey questionnaire. And recent use was defined as women who redeemed a prescription in the period from 365 until 91 days before completing the questionnaire.

**Diet: Healthy (high amount of fruit, vegetables, fish, and low amount of saturated fat), reasonably healthy (median high amount of fruit, vegetables, fish, and saturated fat), or unhealthy diet (low amount of fruit, vegetables, fish, and high amount of saturated fat).**

**Participation in regular physical exercise: Physical activity was asked as participation in leisure sports or other regular physical activity (yes/no) in the questionnaire.**

1  
2  
3  
4 **Acknowledgements:** We wish to thank all the participants who helped us conduct this study by  
5 completing questionnaires.  
6  
7  
8  
9  
10

11  
12  
13 **Funding:** This research was supported by the Clinical Epidemiology Research Foundation, Aarhus  
14 University Hospital, Denmark. The Department of Clinical Epidemiology, Aarhus University  
15 Hospital, receives funding for other studies from companies in the form of research grants to (and  
16 administered by) Aarhus University. None of these studies have any relation to the present study.  
17  
18  
19  
20  
21

22  
23  
24 **Competing interests:** None declared.  
25  
26

27 **Data sharing statement:** No additional data available.  
28  
29  
30  
31  
32  
33  
34  
35  
36  
37  
38  
39  
40  
41  
42  
43  
44  
45  
46  
47  
48  
49  
50  
51  
52  
53  
54  
55  
56  
57  
58  
59  
60

**REFERENCES**

1 Bennett HA, Einarson A, Taddio A, et al. Prevalence of depression during pregnancy; systematic  
review. *Obstet Gynecol* 2004;**103**:698-709.

2 Bennett HA, Einarson A, Taddio A, et al. Depression during Pregnancy: Overview of Clinical  
Factors. *Clin Drug Investig* 2004;**24**:157-179.

3 Zuckerman B, Amaro H, Baucher H, et al. Depressive symptoms during pregnancy: relationship  
to poor health behaviors. *Am J Obstet gynecol* 1989;**160**:1107-1111.

4 Lejoyeux M, Leon E, Rouillon F. Prevalence and risk factors of suicide and attempted suicide.  
*Encephale* 1994;**20**:495-503.

5 Bonari L, Pinto N, Ahn E, et al. Perinatal risks of untreated depression during pregnancy. *Can J  
Psychiatry* 2004;**49**:726-735.

6 Grote NK, Bridge JA, Gavin AR, et al. A meta-analysis of depression during pregnancy and the  
risk of preterm birth, low birth weight, and intrauterine growth restriction. *Arch Gen Psychiatry*  
2010;**67**:1012-1024.

7 Cooper WO, Willy ME, Pont SJ, et al. Increasing use of antidepressants in pregnancy. *Am J  
Obstet Gynecol* 2007;**196**:544.e1-e5.

8 Andrade SE, Raebel MA, Brown J, et al. Use of antidepressant medications during pregnancy: a  
multisite study. *Am J Obstet Gynecol* 2008;**198**:194.e1-e5.

9 Available at: [http://www.sst.dk/Nyhedscenter/Nyheder/2007/nye\\_tal\\_20-07.aspx](http://www.sst.dk/Nyhedscenter/Nyheder/2007/nye_tal_20-07.aspx) . Accesed 3/29  
2013.

1  
2  
3  
4 10 Wen SW, Yang Q, Garner P, et al. Selective serotonin reuptake inhibitors and adverse  
5 pregnancy outcomes. *Am J Obstet Gynecol* 2006;**194**:961-966.  
6  
7

8  
9 11 Lund N, Pedersen LH, Henriksen TB. Selective serotonin reuptake inhibitor exposure in utero  
10 and pregnancy outcomes. *Arch Pediatr Adolesc Med* 2009;**163**:949-954.  
11  
12

13  
14 12 Reis M, Kallen B. Delivery outcome after maternal use of antidepressant drugs in pregnancy: an  
15 update using Swedish data. *Psychol Med* 2010;**40**:1723-1733.  
16  
17

18  
19 13 Pedersen LH, Henriksen TB, Vestergaard M, et al. Selective serotonin reuptake inhibitors in  
20 pregnancy and congenital malformations: population based cohort study. *BMJ* 2009;**339**:b3569.  
21  
22

23  
24 14 Kieler H, Artama M, Engeland A, et al. Selective serotonin reuptake inhibitors during pregnancy  
25 and risk of persistent pulmonary hypertension in the newborn: population based cohort study from  
26  
27  
28  
29  
30  
31  
32  
33  
34  
35  
36  
37  
38  
39  
40  
41  
42  
43  
44  
45  
46  
47  
48  
49  
50  
51  
52  
53  
54  
55  
56  
57  
58  
59  
60

the five Nordic countries. *BMJ* 2012;**339**:d8012.

[15 Jimenez-Solem E, Andersen JT, Petersen M, et al. Exposure to selective serotonin reuptake  
inhibitors and the risk of congenital malformations: a nationwide cohort study. \*BMJ Open\*  
2012;2:e001148](#)

16 Reis M, Kallen B. Combined use of selective serotonin reuptake inhibitors and  
sedatives/hypnotics during pregnancy: risk of relatively severe congenital malformations or cardiac  
defects: A register study. *BMJ Open* 2013;**3**.

17 Alwan S, Reefhuis J, Rasmussen SA, et al. Use of selective serotonin-reuptake inhibitors in  
pregnancy and the risk of birth defects. *N Engl J Med* 2007;**356**:2684-2692.

18 Rogers JM. Tobacco and pregnancy: overview of exposures and effects. *Birth Defects Res C*  
*embryo Today* 2008;**84**:1-15.

1  
2  
3  
4 19 Dennedy MC, Avalos G, O'Reilly MW, et al. The impact of maternal obesity on gestational  
5  
6 outcomes. *Ir Med J* 2012;**105**:23-25.  
7

8  
9 20 Erickson AC, Arbour LT. Heavy smoking during pregnancy as a marker for other risk factors of  
10  
11 adverse birth outcomes: a population-based study in British Columbia, Canada. *BMC Public*  
12  
13 *Health* 2012;**12**:102.  
14

15  
16 21 Mateja WA, Nelson DB, Kroelinger CD, et al. The association between maternal alcohol use  
17  
18 and smoking in early pregnancy and congenital cardiac defects. *J Womens Health (Larchmt)*  
19  
20 2012;**21**:26-34.  
21  
22

23  
24 22 Dawson DA, Grant BF, Stinson FS, et al. Psychopathology associated with drinking and alcohol  
25  
26 use disorders in the college and general adult populations. *Drug Alcohol Depend* 2005;**77**:139-  
27  
28 150.  
29

30  
31 23 Luppino FS, de Wit LM, Bouvy PF, et al. Overweight, obesity, and depression: a systematic  
32  
33 review and meta-analysis of longitudinal studies. *Arch Gen Psychiatry* 2010;**67**:220-229.  
34  
35

36  
37 24 Cheron-Launay M, Le Faou AL, Sevilla-Dedieu C, et al. Smoking and the consumption of  
38  
39 antidepressants, anxiolytics and hypnotic drugs: results of a large, French epidemiological study in  
40  
41 2005. *Addict Behav* 2011;**36**:743-748.  
42  
43

44 25 Pedersen CB. The Danish Civil Registration System. *Scand J Public Health* 2011;**39**:22-25.  
45  
46

47 26 Edwards P, Roberts I, Clarke M, et al. Increasing response rates to postal questionnaires:  
48  
49 systematic review. *BMJ* 2002;**324**:1183.  
50  
51

52  
53 27 Available at: [http://apps.who.int/bmi/index.jsp?introPage=intro\\_3.html](http://apps.who.int/bmi/index.jsp?introPage=intro_3.html) . Accessed 3/29 2013.  
54  
55



1  
2  
3  
4 [28 Toft U, Kristoffersen LH, Lau C, et al. The Dietary Quality Score: validation and association](#)  
5  
6 [with cardiovascular risk factors: the Inter99 study. Eur J Clin Nutr 2007;61:270-278.](#)  
7

8  
9  
10 29 Available at: [www.sst.dk/Sundhed%20og%20forebyggelse/Alkohol.aspx](http://www.sst.dk/Sundhed%20og%20forebyggelse/Alkohol.aspx). Accessed 5/28 2013.

11  
12 30 Ehrenstein V, Antonsen S, Pedersen L. Existing data sources for clinical epidemiology: Aarhus  
13  
14 University Prescription Database. *Clin Epidemiol* 2010;2:273-279.  
15  
16  
17  
18  
19  
20  
21  
22  
23  
24  
25  
26  
27  
28  
29  
30  
31  
32  
33  
34  
35  
36  
37  
38  
39  
40  
41  
42  
43  
44  
45  
46  
47  
48  
49  
50  
51  
52  
53  
54  
55  
56  
57  
58  
59  
60

**Table x.** Prevalence ratios (PRs) and 95% confidence intervals (95% CIs) for use of selective serotonin reuptake inhibitors (SSRIs) in women aged 25-44 years, according to different lifestyle factors and stratified on age (25-34 and 35-44 years of age).

| SSRI use                  | PRs comparing obese vs. non-obese women<br>[95% CIs] | PRs comparing current smokers vs. non-current smokers<br>[95% CIs] | PRs comparing alcohol intake above seven drinks weekly vs. alcohol intake of seven drinks or less weekly<br>[95% CIs] | PRs comparing alcohol intake above 14 drinks weekly vs. alcohol intake of 14 drinks or less weekly<br>[95% CIs] | PRs comparing unhealthy diet vs. healthy diet<br>[95% CIs] | PRs comparing participation in regular activity vs. not participation in regular activity<br>[95% CIs] |
|---------------------------|------------------------------------------------------|--------------------------------------------------------------------|-----------------------------------------------------------------------------------------------------------------------|-----------------------------------------------------------------------------------------------------------------|------------------------------------------------------------|--------------------------------------------------------------------------------------------------------|
| <b>25-44 years of age</b> |                                                      |                                                                    |                                                                                                                       |                                                                                                                 |                                                            |                                                                                                        |
| Never use                 | 1 (reference)                                        | 1 (reference)                                                      | 1 (reference)                                                                                                         | 1 (reference)                                                                                                   | 1 (reference)                                              | 1 (reference)                                                                                          |
| Current use               | 1.5 [1.0 – 2.3]                                      | 1.6 [1.1 – 2.2]                                                    | 1.8 [1.2 – 2.8]                                                                                                       | 2.9 [1.7 – 5.3]                                                                                                 | 1.7 [1.2 – 2.6]                                            | 0.9 [0.6 – 1.2]                                                                                        |
| Current/recent use        | 1.4 [1.0 – 2.0]                                      | 1.7 [1.3 – 2.2]                                                    | 1.4 [0.9 – 2.1]                                                                                                       | 2.4 [1.4 – 4.1]                                                                                                 | 1.8 [1.3 – 2.6]                                            | 0.8 [0.6 – 1.0]                                                                                        |
| Former use                | 1.4 [1.0 – 1.9]                                      | 1.8 [1.3 – 2.3]                                                    | 1.4 [0.9 – 2.1]                                                                                                       | 1.1 [0.5 – 2.6]                                                                                                 | 1.1 [0.8 – 1.7]                                            | 0.8 [0.6 – 1.0]                                                                                        |
| <b>25-34 years of age</b> |                                                      |                                                                    |                                                                                                                       |                                                                                                                 |                                                            |                                                                                                        |
| Never use                 | 1 (reference)                                        | 1 (reference)                                                      | 1 (reference)                                                                                                         | 1 (reference)                                                                                                   | 1 (reference)                                              | 1 (reference)                                                                                          |
| Current use               | 1.2 [0.6 – 2.5]                                      | 2.3 [1.3 – 4.0]                                                    | 2.0 [0.9 – 4.6]                                                                                                       | 5.8 [2.0 – 16.6]                                                                                                | 3.0 [1.7 – 5.4]                                            | 0.8 [0.5 – 1.4]                                                                                        |
| Current/recent use        | 1.3 [0.7 – 2.2]                                      | 2.1 [1.4 – 3.3]                                                    | 1.4 [0.7 – 3.1]                                                                                                       | 4.9 [1.9 – 11.1]                                                                                                | 2.8 [1.8 – 4.4]                                            | 0.8 [0.5 – 1.1]                                                                                        |
| Former use                | 1.1 [0.6 – 2.0]                                      | 2.2 [1.4 – 3.5]                                                    | 1.6 [0.8 – 3.5]                                                                                                       | 1.5 [0.2 – 10.1]                                                                                                | 0.9 [0.4 – 1.9]                                            | 0.8 [0.5 – 1.2]                                                                                        |
| <b>35-44 years of age</b> |                                                      |                                                                    |                                                                                                                       |                                                                                                                 |                                                            |                                                                                                        |
| Never use                 | 1 (reference)                                        | 1 (reference)                                                      | 1 (reference)                                                                                                         | 1 (reference)                                                                                                   | 1 (reference)                                              | 1 (reference)                                                                                          |
| Current use               | 1.7 [1.1 – 2.7]                                      | 1.3 [0.8 – 2.0]                                                    | 1.7 [1.0 – 2.7]                                                                                                       | 2.3 [1.2 – 4.6]                                                                                                 | 1.2 [0.7 – 2.1]                                            | 0.9 [0.6 – 1.3]                                                                                        |
| Current/recent use        | 1.5 [1.0 – 2.3]                                      | 1.4 [1.0 – 2.1]                                                    | 1.4 [0.9 – 2.3]                                                                                                       | 1.9 [1.0 – 3.7]                                                                                                 | 1.3 [0.8 – 2.1]                                            | 0.8 [0.6 – 1.1]                                                                                        |
| Former use                | 1.6 [1.1 – 2.4]                                      | 1.5 [1.1 – 2.2]                                                    | 1.2 [0.8 – 2.1]                                                                                                       | 1.0 [0.4 – 2.6]                                                                                                 | 1.3 [0.8 – 2.1]                                            | 0.8 [0.6 – 1.1]                                                                                        |

STROBE 2007 (v4) Statement—Checklist of items that should be included in reports of *cross-sectional studies*

| Section/Topic                | Item # | Recommendation                                                                                                                                                                       | Reported on page # |
|------------------------------|--------|--------------------------------------------------------------------------------------------------------------------------------------------------------------------------------------|--------------------|
| Title and abstract           | 1      | (a) Indicate the study's design with a commonly used term in the title or the abstract                                                                                               | 1,2                |
|                              |        | (b) Provide in the abstract an informative and balanced summary of what was done and what was found                                                                                  | 2                  |
| <b>Introduction</b>          |        |                                                                                                                                                                                      |                    |
| Background/rationale         | 2      | Explain the scientific background and rationale for the investigation being reported                                                                                                 | 5                  |
| Objectives                   | 3      | State specific objectives, including any prespecified hypotheses                                                                                                                     | 5                  |
| <b>Methods</b>               |        |                                                                                                                                                                                      |                    |
| Study design                 | 4      | Present key elements of study design early in the paper                                                                                                                              | 6                  |
| Setting                      | 5      | Describe the setting, locations, and relevant dates, including periods of recruitment, exposure, follow-up, and data collection                                                      | 6                  |
| Participants                 | 6      | (a) Give the eligibility criteria, and the sources and methods of selection of participants                                                                                          | 6,7                |
| Variables                    | 7      | Clearly define all outcomes, exposures, predictors, potential confounders, and effect modifiers. Give diagnostic criteria, if applicable                                             | 7,8,9              |
| Data sources/<br>measurement | 8*     | For each variable of interest, give sources of data and details of methods of assessment (measurement). Describe comparability of assessment methods if there is more than one group | 7,8,9              |
| Bias                         | 9      | Describe any efforts to address potential sources of bias                                                                                                                            |                    |
| Study size                   | 10     | Explain how the study size was arrived at                                                                                                                                            | 7                  |
| Quantitative variables       | 11     | Explain how quantitative variables were handled in the analyses. If applicable, describe which groupings were chosen and why                                                         | 7,8                |
| Statistical methods          | 12     | (a) Describe all statistical methods, including those used to control for confounding                                                                                                | 9                  |
|                              |        | (b) Describe any methods used to examine subgroups and interactions                                                                                                                  |                    |
|                              |        | (c) Explain how missing data were addressed                                                                                                                                          | 9                  |
|                              |        | (d) If applicable, describe analytical methods taking account of sampling strategy                                                                                                   |                    |
|                              |        | (e) Describe any sensitivity analyses                                                                                                                                                | 9                  |
| <b>Results</b>               |        |                                                                                                                                                                                      |                    |

|                          |     |                                                                                                                                                                                                              |          |
|--------------------------|-----|--------------------------------------------------------------------------------------------------------------------------------------------------------------------------------------------------------------|----------|
| Participants             | 13* | (a) Report numbers of individuals at each stage of study—eg numbers potentially eligible, examined for eligibility, confirmed eligible, included in the study, completing follow-up, and analysed            | 10       |
|                          |     | (b) Give reasons for non-participation at each stage                                                                                                                                                         | 10       |
|                          |     | (c) Consider use of a flow diagram                                                                                                                                                                           |          |
| Descriptive data         | 14* | (a) Give characteristics of study participants (eg demographic, clinical, social) and information on exposures and potential confounders                                                                     | 10,14    |
|                          |     | (b) Indicate number of participants with missing data for each variable of interest                                                                                                                          | 14       |
| Outcome data             | 15* | Report numbers of outcome events or summary measures                                                                                                                                                         | 10, 14   |
| Main results             | 16  | (a) Give unadjusted estimates and, if applicable, confounder-adjusted estimates and their precision (eg, 95% confidence interval). Make clear which confounders were adjusted for and why they were included | 16       |
|                          |     | (b) Report category boundaries when continuous variables were categorized                                                                                                                                    | 7, 8, 14 |
|                          |     | (c) If relevant, consider translating estimates of relative risk into absolute risk for a meaningful time period                                                                                             |          |
| Other analyses           | 17  | Report other analyses done—eg analyses of subgroups and interactions, and sensitivity analyses                                                                                                               | 9, 16    |
| <b>Discussion</b>        |     |                                                                                                                                                                                                              |          |
| Key results              | 18  | Summarise key results with reference to study objectives                                                                                                                                                     | 11       |
| Limitations              | 19  | Discuss limitations of the study, taking into account sources of potential bias or imprecision. Discuss both direction and magnitude of any potential bias                                                   | 12, 13   |
| Interpretation           | 20  | Give a cautious overall interpretation of results considering objectives, limitations, multiplicity of analyses, results from similar studies, and other relevant evidence                                   | 11, 12   |
| Generalisability         | 21  | Discuss the generalisability (external validity) of the study results                                                                                                                                        | 13       |
| <b>Other information</b> |     |                                                                                                                                                                                                              |          |
| Funding                  | 22  | Give the source of funding and the role of the funders for the present study and, if applicable, for the original study on which the present article is based                                                | 17       |

\*Give information separately for cases and controls in case-control studies and, if applicable, for exposed and unexposed groups in cohort and cross-sectional studies.

**Note:** An Explanation and Elaboration article discusses each checklist item and gives methodological background and published examples of transparent reporting. The STROBE checklist is best used in conjunction with this article (freely available on the Web sites of PLoS Medicine at <http://www.plosmedicine.org/>, Annals of Internal Medicine at <http://www.annals.org/>, and Epidemiology at <http://www.epidem.com/>). Information on the STROBE Initiative is available at [www.strobe-statement.org](http://www.strobe-statement.org).
